## Supplementary Tables

| Identified phenotype                            | Identified phenotype CUI | Benjamini-Hochberg corrected p-value | Pathway genes associated with identified phenotype                                      | Number of pathway genes associated with identified phenotype | Total number of genes associated with the phenotype |
|-------------------------------------------------|--------------------------|--------------------------------------|-----------------------------------------------------------------------------------------|--------------------------------------------------------------|-----------------------------------------------------|
| Wolff-Parkinson-White pattern                   | C0043202                 | 1.02E-05                             | PRKAA1,PRKAA2,PRKAG2,PRKAB1                                                             | 4                                                            | 35                                                  |
| Oculopharyngeal muscular dystrophy              | C0270952                 | 1.28E-05                             | PRKAA1,PRKAA2,PRKAB1                                                                    | 3                                                            | 25                                                  |
| Fibromyalgia                                    | C0016053                 | 1.41E-05                             | PRKAA1,PRKAA2,PRKAB1                                                                    | 3                                                            | 48                                                  |
| Ovarian Diseases                                | C0029928                 | 1.53E-05                             | PPARGC1A,STK11,PRKAA2,SLC22A1,PRKAG3                                                    | 5                                                            | 236                                                 |
| Infection by Cryptococcus neoformans            | C0010414                 | 1.66E-05                             | PRKAA1,PRKAA2,PRKAB1                                                                    | 3                                                            | 57                                                  |
| Disorders of Intracellular Cobalamin Metabolism | C0025517                 | 2.56E-05                             | PPARGC1A,PRKAA1,STK11,PRKAA2,PRKAG2,PRKAB1                                              | 6                                                            | 394                                                 |
| Peutz-Jeghers syndrome                          | C0031269                 | 2.69E-05                             | STK11,CAB39,STRADA                                                                      | 3                                                            | 73                                                  |
| Diabetes mellitus type 2                        | C0011860                 | 2.81E-05                             | PPARGC1A,PRKAG1,PRKAA1,STK11,SLC22A2,PRKAA2,PRKAG2,SLC47A1,SLC22A1,PRKAG3,PRKAB1,PRKAB2 | 12                                                           | 1972                                                |
| Diabetes Mellitus, Type 1                       | C0011849                 | 4.35E-05                             | PPARGC1A,PRKAG1,PRKAA1,STK11,SLC22A2,PRKAA2,PRKAG2,SLC47A1,SLC22A1,PRKAG3,PRKAB1,PRKAB2 | 12                                                           | 2081                                                |
| Tuberous sclerosis syndrome                     | C0041341                 | 4.48E-05                             | PRKAA1,STK11,PRKAA2,PRKAB1                                                              | 4                                                            | 192                                                 |
| Extrahepatic cholestasis                        | C0005398                 | 5.24E-05                             | SLC22A2,SLC22A1                                                                         | 2                                                            | 30                                                  |
| Chronic kidney disease                          | C1561643                 | 5.37E-05                             | PRKAA1,SLC22A2,PRKAA2,PRKAG2,PRKAB1                                                     | 5                                                            | 342                                                 |
| Atherosclerosis                                 | C0004153                 | 5.50E-05                             | PPARGC1A,PRKAG1,PRKAA1,PRKAA2,PRKAG2,SLC22A1,PRKAG3,PRKAB1,PRKAB2                       | 9                                                            | 1271                                                |
| Neoplasm of the rectum                          | C0034885                 | 5.63E-05                             | PRKAA1,STK11,PRKAG2                                                                     | 3                                                            | 105                                                 |
| Neoplasm of the colon                           | C0009375                 | 6.91E-05                             | SLC22A3,PRKAA1,STK11,PRKAG2,SLC22A1,RB1CC1,PRKAB1                                       | 7                                                            | 817                                                 |

|                      |          |          |                                   |   |     |
|----------------------|----------|----------|-----------------------------------|---|-----|
| Pleural Mesothelioma | C0812413 | 7.03E-05 | SLC22A3,PRKAA1,PRKA<br>A2,PRKAB1  | 4 | 240 |
| Memory impairment    | C0233794 | 7.67E-05 | PPARGC1A,PRKAA1,PR<br>KAA2,PRKAB1 | 4 | 255 |
| Cardiomegaly         | C0018800 | 8.57E-05 | PPARGC1A,STK11,PRKA<br>A2,PRKAG2  | 4 | 279 |
