# Supplementary material for: PathFX provides mechanistic insights into drug efficacy and safety for regulatory review and therapeutic development
Source: PLoS Comput Biol. 2018 Dec 7;14(12):e1006614. doi: 10.1371/journal.pcbi.1006614 (PMC6285459; doi:10.1371/journal.pcbi.1006614)
Supplement: S4 File — A summary of drug-disease associations ranked by the number of pathways supporting an association and by the number of predicted alternative indications. (XLSX) [file pcbi.1006614.s004.xlsx]

## Sheet: Drug-Disease-Predictions
Drug	Indication	Number of Pathways Supporting
Vandetanib	Renal cell carcinoma, nonpapillary	126339
Vandetanib	Status epilepticus	82665
Tetracycline	Hypertension	64964
Ximelagatran	Arteriosclerosis	61205
Haloperidol	Parkinsonism	55008
Testosterone	Hyperlipidemia, combined, 1	42050
Ximelagatran	Asthma	39630
Haloperidol	Schizophrenia	35649
Vandetanib	Schizophrenia	26187
Diphemanil Methylsulfate	Hay fever	24435
Vandetanib	Blast Phase	21110
XL228	Blast Phase	17619
Diphemanil Methylsulfate	Bipolar affective disorder	16528
Vandetanib	Crohn Disease	16084
Vandetanib	Neuralgia	14431
Thiocoumarin	Arthritis, Rheumatoid	14408
Prazosin	Prostatic Neoplasms	14271
Tetracycline	Diabetes mellitus type 2	13934
Ximelagatran	Pulmonary Disease, Chronic Obstructive	13874
Haloperidol	Major depressive disorder	13843
XL184	Gastrointestinal Neoplasms	13582
Doxepin	Hay fever	12386
Prazosin	Hypersensitivity	12175
XL228	Leukemia, Lymphocytic, Chronic, B-Cell	11828
Thiocoumarin	Inflammatory Bowel Diseases	11740
XL184	Neuroendocrine neoplasm	10934
Haloperidol	Diabetes Mellitus, Type 1	10648
Vandetanib	Pneumonia	8737
XL184	Neoplasms	8736
Tetracycline	Hypercholesterolemia, autosomal dominant, type B	8436
Doxepin	Dementia	8250
Prazosin	Depressive Disorder	7865
XL184	Renal cell carcinoma, nonpapillary	6872
Haloperidol	Prostatic Neoplasms	6669
Thiocoumarin	Rheumatoid arthritis	6270
Prazosin	Arthritis, Rheumatoid	5723
Vandetanib	Hypercholesterolemia, autosomal dominant, type B	4904
Thiothixene	Hypersensitivity	4864
XL184	Leukemia, Myeloid, Chronic-Phase	4840
Vandetanib	Ulcerative colitis	4775
3-SULFOOXY-1H-INDOLE	Non-Hodgkin lymphoma	4070
Somatropin recombinant	Hypogonadotropic hypogonadism 7 with or without anosmia	4014
Lenvatinib	Hodgkin Disease	3958
Vandetanib	Cutaneous T-cell lymphoma	3864
SO-101	Allergic rhinitis	3282
Doxepin	Autism 15	3254
Caffeine	Dermatitis, Atopic	3210
Prazosin	Rheumatoid arthritis	3168
Prazosin	Hypertension	3054
3-SULFOOXY-1H-INDOLE	Nephrotic syndrome, type 5, with or without ocular abnormalities	2827
Doxepin	Paroxysmal atrial fibrillation	2691
Haloperidol	Psoriasis	2691
Thiothixene	Dementia	2591
XL184	Systemic mastocytosis with associated clonal, hematologic non-mast-cell lineage disease	2522
Thiocoumarin	Multiple Sclerosis	2448
Vandetanib	Cancer of Head and Neck	2447
XL184	Blast Phase	2447
Lenvatinib	Schizophrenia	2410
Sulfasalazine	Asthma	2340
Caffeine	Neoplasms	2206
NXN-188	Acromegaly	2120
Pargyline	Parkinson Disease	2120
Loxapine	Parkinson Disease	1971
Tolvaptan	Nephrotic syndrome, type 5, with or without ocular abnormalities	1959
Prazosin	Renal cell carcinoma, nonpapillary	1948
Treprostinil	Pulmonary Disease, Chronic Obstructive	1921
Thiocoumarin	Lupus Erythematosus, Systemic	1884
4-(1H-IMIDAZOL-1-YL)PHENOL	Dermatitis, Atopic	1842
Prazosin	Inflammatory Bowel Diseases	1828
Sulfamethazine	Dermatosis NOS	1759
5-(5-chloro-7H-pyrrolo[2,3-d]pyrimidin-4-yl)-4,5,6,7-tetrahydro-1H-imidazo[4,5-c]pyridine	Leukemia, Lymphocytic, Chronic, B-Cell	1708
NXN-188	Parkinsonism	1655
Pasireotide	Neuroendocrine neoplasm	1634
Lenvatinib	Major depressive disorder	1628
XL184	Leukemia, Lymphocytic, Chronic, B-Cell	1628
Ximelagatran	Epilepsy	1478
Haloperidol	Urticaria	1424
ACP-104	Asthma	1382
(1S)-2-[(2S,5R)-2-(AMINOMETHYL)-5-ETHYNYLPYRROLIDIN-1-YL]-1-CYCLOPENTYL-2-OXOETHANAMINE	Diabetes mellitus type 2	1381
Cabergoline	Cutaneous T-cell lymphoma	1349
Lenvatinib	Status epilepticus	1342
Lenvatinib	Non-small cell lung carcinoma	1339
Cefalotin	Multiple Sclerosis	1308
Loxapine	Schizophrenia	1296
Tetracycline	Adenocarcinoma, ovarian, somatic, 167000 (3)	1278
Vandetanib	Autoimmune disease 1	1278
Zidovudine	Familial type 3 hyperlipoproteinemia	1192
Tolvaptan	Non-small cell lung carcinoma	1154
Haloperidol	Bipolar affective disorder	1117
Tolvaptan	Gastrointestinal stromal tumor	1115
Paramethadione	Familial type 3 hyperlipoproteinemia	1085
OSI-930	Leukemia, Lymphocytic, Chronic, B-Cell	1064
Salbutamol	Parkinson Disease	892
ACP-104	Urticaria	874
(1H-indol-3-yl)-(2-mercapto-ethoxyimino)-acetic acid	Hay fever	873
Lenvatinib	Lymphoma, Large B-Cell, Diffuse	873
Prazosin	Ulcerative colitis	856
Lumateperone	Schizophrenia	847
S-Ethylisothiourea	Sarcoidosis	823
Vandetanib	Gastrointestinal Neoplasms	787
Cabergoline	Familial type 3 hyperlipoproteinemia	774
YSIL6	Malaria, Vivax	760
Haloperidol	Pruritus	759
OSI-930	Gastrointestinal Neoplasms	737
Piperacillin	Diabetic Nephropathies	737
Doxycycline	Liver Cirrhosis, Biliary	726
S-Ethylisothiourea	Anterior uveitis	724
Droperidol	Schizophrenia	717
Lumateperone	Allergic rhinitis	663
Lenvatinib	Pain	662
Prazosin	Diabetes mellitus type 2	628
ACP-104	Hypersensitivity	583
Caffeine	Parkinsonism	583
ACP-104	Major depressive disorder	530
(2S,3S)-3-AMINO-4-[(3S)-3-FLUOROPYRROLIDIN-1-YL]-N,N-DIMETHYL-4-OXO-2-(TRANS-4-[1,2,4]TRIAZOLO[1,5-A]PYRIDIN-5-YLCYCLOHEXYL)BUTANAMIDE	Diabetes mellitus type 2	509
Haloperidol	Renal cell carcinoma, nonpapillary	488
Celiprolol	Hyperlipidemia, combined, 1	476
ACP-104	Allergic rhinitis	466
OSI-930	Neoplasms	464
Phenmetrazine	Depressive Disorder	464
Treprostinil	Diabetes Mellitus, Type 1	463
Thiothixene	Hypothyroidism	448
(9BETA,11ALPHA,13ALPHA,14BETA,17ALPHA)-11-(METHOXYMETHYL)ESTRA-1(10),2,4-TRIENE-3,17-DIOL	Prostatic Neoplasms	445
Bambuterol	Asthma	442
Pyridoxine	Contact Dermatitis	434
(2R,4R)-N~1~-(4-CHLOROPHENYL)-N~2~-[2-FLUORO-4-(2-OXOPYRIDIN-1(2H)-YL)PHENYL]-4-METHOXYPYRROLIDINE-1,2-DICARBOXAMIDE	Acute myocardial ischemia	401
Caffeine	Thyroid Diseases	401
Lenvatinib	Diabetes Mellitus, Type 1	401
Caffeine	Blast Phase	400
Doxepin	Hypersensitivity	393
OSI-930	Neuroendocrine neoplasm	382
Piperacillin	Hypertension	382
4-(1H-IMIDAZOL-1-YL)PHENOL	Rheumatoid arthritis	380
ACP-104	Depressive Disorder	380
Loxapine	Major depressive disorder	380
4-(Hydroxymercury)Benzoic Acid	Kidney Diseases	376
Lenvatinib	Acute promyelocytic leukemia	372
Trastuzumab	Rheumatoid arthritis	367
Maraviroc	Ulcerative colitis	358
CHF-1512	Parkinsonism	339
Prazosin	Heart Diseases	339
Cabergoline	Autism 15	334
Sulfamethazine	Insulin Resistance	328
Triptorelin	Endometriosis	325
OSI-930	Renal cell carcinoma, nonpapillary	318
Perindopril	Hypercholesterolemia, autosomal dominant, type B	318
Haloperidol	Non-small cell lung carcinoma	313
Telmisartan	Diabetes mellitus type 2	310
Cabergoline	Asthma	294
Doxepin	Schizophrenia	271
Haloperidol	Ulcerative colitis	268
Celiprolol	Hypertension	259
Lenvatinib	Kidney Diseases	257
Celiprolol	Diabetes mellitus type 2	255
OSI-930	Blast Phase	252
Piperacillin	Kidney Diseases	252
Cabergoline	Inflammatory Bowel Diseases	248
Pramipexole	Hay fever	246
Thiothixene	Epilepsy	240
Bambuterol	Hypertension	234
OSI-930	Idiopathic hypereosinophilic syndrome	233
Pramipexole	Bipolar affective disorder	233
Vandetanib	Leukemia, Myeloid, Chronic-Phase	226
Lumateperone	Autism 15	221
Lenvatinib	Wilms Tumor	219
THIENO[3,2-B]PYRIDINE-2-SULFONIC ACID [2-OXO-1-(1H-PYRROLO[2,3-C]PYRIDIN-2-YLMETHYL)-PYRROLIDIN-3-YL]-AMIDE	Deep venous thrombosis	219
Suramin	Acute myocardial ischemia	211
Haloperidol	Crohn Disease	210
Chlorphenamine	Diabetes mellitus type 2	209
Trastuzumab	Pancreatic adenocarcinoma	195
Cabergoline	Nephrotic syndrome, type 5, with or without ocular abnormalities	194
Ulipristal	Diabetes mellitus type 2	194
Haloperidol	Heart Diseases	187
OSI-930	Leukemia, Myeloid, Chronic-Phase	173
Pramipexole	Schizophrenia	173
(3R,4R)-1-{6-[3-(METHYLSULFONYL)PHENYL]PYRIMIDIN-4-YL}-4-(2,4,5-TRIFLUOROPHENYL)PIPERIDIN-3-AMINE	Diabetes mellitus type 2	168
Aflibercept	Diabetes mellitus type 2	168
Caffeine	Wilms Tumor	168
Dexfenfluramine	Myocardial Infarction	168
Doxepin	Acromegaly	168
Lenvatinib	Liver Cirrhosis, Biliary	168
Cabozantinib	Crohn Disease	166
CYT006-AngQb	Hypertension	162
Caffeine	Vascular Diseases	158
Histrelin	Endometriosis	154
Telmisartan	Diabetes Mellitus, Type 1	150
Propiomazine	Acromegaly	145
Chlorphenamine	Rhinitis, Allergic, Seasonal	132
Itopride	Alzheimer Disease	132
(3AS,4R,9BR)-4-(4-HYDROXYPHENYL)-1,2,3,3A,4,9B-HEXAHYDROCYCLOPENTA[C]CHROMEN-9-OL	Disorder of endocrine system	128
ACP-104	Acromegaly	128
OSI-930	Systemic mastocytosis with associated clonal, hematologic non-mast-cell lineage disease	127
Pramipexole	Autism 15	127
Vandetanib	Hyperlipidemia, combined, 1	126
Doxepin	Urticaria	108
ACP-104	Parkinson Disease	107
Lumateperone	Hypersensitivity	107
(S)-N-(4-carbamimidoylbenzyl)-1-(2-(cyclopentyloxy)ethanoyl)pyrrolidine-2-carboxamide	Acute myocardial ischemia	106
Aflibercept	Diabetes Mellitus, Type 1	106
Caffeine	Hypothyroidism	106
Dexfenfluramine	Pain	106
Lenvatinib	Cutaneous T-cell lymphoma	106
Ticagrelor	Ulcerative colitis	104
Rimonabant	Psoriasis	101
Telmisartan	Pain	94
CTA018	Hypocalcemia	92
Pramipexole	Prostatic Neoplasms	90
Vandetanib	Goiter, multinodular 1, with or without sertoli-leydig cell tumors	89
Tolvaptan	Major depressive disorder	85
Cabozantinib	Psoriasis	84
Dexfenfluramine	Pulmonary Disease, Chronic Obstructive	84
CYT006-AngQb	Diabetes mellitus type 2	78
Salbutamol	Non-small cell lung carcinoma	76
Chlorphenamine	Diarrhea 8, secretory sodium, congenital	75
Itopride	Parkinson Disease	75
Carvedilol	Diabetes mellitus type 2	73
Memantine	Nicotine Dependence	72
Probenecid	Diabetes mellitus type 2	72
Ticagrelor	Rheumatoid arthritis	70
Carvedilol	Rhinitis, Allergic, Seasonal	69
Agmatine	Bipolar affective disorder	67
Memantine	Diabetes mellitus type 2	67
SO-101	Asthma	67
3-SULFOOXY-1H-INDOLE	Diabetic Nephropathies	66
Tetracycline	Diabetic Nephropathies	62
Tetracycline	Kidney Diseases	61
Testosterone	Hypercholesterolemia, autosomal dominant, type B	60
XL880	Gastrointestinal stromal tumor	60
SSR-126517E	Acute myocardial ischemia	59
Haloperidol	Myocardial Infarction	58
XL228	Gastrointestinal stromal tumor	57
XL228	Idiopathic hypereosinophilic syndrome	57
Agmatine	Parkinson Disease	56
Liothyronine	Hyperkeratosis	56
Prazosin	Myocardial Infarction	56
SO-101	Schizophrenia	56
Testosterone	Myocardial Infarction	56
ACP-104	Hay fever	55
Caffeine	Epilepsy	55
Diphemanil Methylsulfate	Schizophrenia	55
Gliclazide	Depressive Disorder	55
Vandetanib	Multiple Sclerosis	55
Vandetanib	Inflammatory Bowel Diseases	55
Ximelagatran	Hypertension	55
Heroin	Disorder of endocrine system	54
Vandetanib	Non-Hodgkin lymphoma	54
Ximelagatran	Diabetes Mellitus, Type 1	52
Cabergoline	Schizophrenia	51
Ticagrelor	Diabetes Mellitus, Type 1	51
Ximelagatran	Myocardial Infarction	51
intranasal apomorphine	Alzheimer Disease	50
3-(4-CHLOROPHENYL)-5-(METHYLTHIO)-4H-1,2,4-TRIAZOLE	Acute myocardial ischemia	49
Aminoguanidine	Cutaneous T-cell lymphoma	49
Thiothixene	Nephrotic syndrome, type 5, with or without ocular abnormalities	49
Tizanidine	Depressive Disorder	49
Ulipristal	Heart Diseases	49
Apremilast	Inflammatory Bowel Diseases	48
Doxepin	Status epilepticus	48
Bambuterol	Parkinson Disease	47
Bromopride	Acromegaly	47
Cabozantinib	Head and Neck Neoplasms	47
Oxaliplatin	Germinal Center B-Cell-Like Diffuse Large B-Cell Lymphoma	46
Apremilast	Adenocarcinoma, ovarian, somatic, 167000 (3)	45
Doxepin	Diabetes Mellitus, Type 1	43
(2R,3R,4S)-3-(4-HYDROXYPHENYL)-4-METHYL-2-[4-(2-PYRROLIDIN-1-YLETHOXY)PHENYL]CHROMAN-6-OL	Disorder of endocrine system	42
Caffeine	Adenocarcinoma, ovarian, somatic, 167000 (3)	42
Chlorphenamine	Epilepsy	42
Halothane	Non-small cell lung carcinoma	42
Itopride	Urticaria	42
Lenvatinib	Autoimmune disease 1	42
Loxapine	Paroxysmal atrial fibrillation	42
Minocycline	Diabetes mellitus type 2	42
Nafarelin	Precocious puberty	42
Thiothixene	Hypertension	42
Vandetanib	Familial type 3 hyperlipoproteinemia	42
XL228	Diabetes Mellitus, Type 1	42
Carvedilol	Pancreatic adenocarcinoma	41
ALKS 27	Schizophrenia	40
ANA971	Discoid lupus erythematosus	40
Bicifadine	Schizophrenia	40
Caffeine	Disorder of endocrine system	40
Clocortolone	Lupus Erythematosus, Systemic	40
Droperidol	Parkinson Disease	40
Eluxadoline	Diabetes mellitus type 2	40
Lenvatinib	Adenocarcinoma, ovarian, somatic, 167000 (3)	40
Somatropin recombinant	Noonan syndrome 1	40
Telmisartan	Inflammatory Bowel Diseases	40
Ticagrelor	Autoimmune disease 1	40
Vortioxetine	Epilepsy	40
(1H-indol-3-yl)-(2-mercapto-ethoxyimino)-acetic acid	Allergic rhinitis	39
Apremilast	Psoriasis	39
Caffeine	Arteriosclerosis	39
Imiquimod	Discoid lupus erythematosus	39
Lenvatinib	Prostatic Neoplasms	39
Telmisartan	Hypertension	39
AZD2171	Neuroendocrine neoplasm	38
Clomipramine	Hypothyroidism	38
CYT006-AngQb	Kidney Diseases	38
Memantine	Hyperlipidemia, combined, 1	38
Pancuronium	Pruritus	38
Proflavine	Acute myocardial ischemia	38
Rotigotine	Endometriosis	38
Thiothixene	Schizophrenia	38
Tocainide	Hypothyroidism	38
Buspirone	Kidney Diseases	37
Lenvatinib	Bipolar affective disorder	37
Buspirone	Dermatosis NOS	36
Cabergoline	Dementia	36
Doxepin	Psoriasis	36
Lenvatinib	Lupus Erythematosus, Systemic	36
Meloxicam	Head and Neck Neoplasms	36
Flavoxate	Dementia	35
Haloperidol	Endometrial carcinoma	35
Minocycline	Diabetic Nephropathies	35
Rimonabant	Kidney Diseases	35
Tocainide	Myocardial Infarction	35
Vandetanib	Kidney Diseases	35
ALKS 27	Dementia	34
Droperidol	Asthma	34
Lenvatinib	Rheumatoid arthritis	34
Lenvatinib	Heart Diseases	34
Liothyronine	Hypercholesterolemia, autosomal dominant, type B	34
Nilotinib	Diarrhea 8, secretory sodium, congenital	34
Vandetanib	Hyperkeratosis	34
Vortioxetine	Arthritis, Rheumatoid	34
YSIL6	Familial cold-induced inflammatory syndrome 1, 120100 (3)	34
Aminocaproic Acid	Bleeding disorder, platelet-type, 21	33
AZD6140	Arteriosclerosis	33
Bicifadine	Hypersensitivity	33
Carvedilol	Atrial Fibrillation	33
Clomipramine	Depressive Disorder	33
Flavoxate	Hypersensitivity	33
intranasal apomorphine	Parkinson Disease	33
Pancuronium	Parkinsonism	33
Rotigotine	Hyperlipidemia, combined, 1	33
Tocainide	Amyotrophic Lateral Sclerosis	33
Apremilast	Lymphoma, Large B-Cell, Diffuse	32
Apremilast	Head and Neck Neoplasms	32
Doxepin	Hypothyroidism	31
Eluxadoline	Renal cell carcinoma, nonpapillary	31
Thiothixene	Non-Hodgkin lymphoma	31
Vandetanib	Diabetic Nephropathies	31
Agmatine	Diabetes mellitus type 2	30
ALKS 27	Depressive Disorder	30
Bepridil	Epilepsy	30
Caffeine	Contact Dermatitis	30
Clomipramine	Diabetic Nephropathies	30
Gliclazide	Pancreatic adenocarcinoma	30
Lenvatinib	Arthritis, Rheumatoid	30
Lenvatinib	Head and Neck Neoplasms	30
Simeprevir	Familial type 3 hyperlipoproteinemia	30
XL880	Renal cell carcinoma, nonpapillary	30
Vortioxetine	Alzheimer Disease	29
2-[4-(DIMETHYLAMINO)PHENYL]-6-HYDROXY-3-METHYL-1,3-BENZOTHIAZOL-3-IUM	Alzheimer Disease	28
ALKS 27	Bipolar affective disorder	28
Dexfenfluramine	Alzheimer Disease	28
Halothane	Non-Hodgkin lymphoma	28
Desflurane	Hyperkeratosis	27
Dexfenfluramine	Diarrhea 8, secretory sodium, congenital	27
Halothane	Adenocarcinoma, ovarian, somatic, 167000 (3)	27
Hydrocortisone	Anterior uveitis	27
Minocycline	Hypertension	27
Sunitinib	Wilms Tumor	27
Tolvaptan	Autism 15	27
Droperidol	Depressive Disorder	26
Loxapine	Parkinsonism	26
Prazosin	Endometrial carcinoma	26
XL228	Neoplasms	26
Bicifadine	Major depressive disorder	25
Caffeine	Asthma	25
Fludrocortisone	Prostatic Neoplasms	25
Lenvatinib	Psoriasis	25
S-Ethylisothiourea	Arthritis, Rheumatoid	25
Cabergoline	Hypertension	24
Clomipramine	Thyroid Diseases	24
Doxepin	Dermatosis NOS	24
Halothane	Pain	24
Itopride	Hypersensitivity	24
Loxapine	Hypotension	24
Oxaliplatin	Head and Neck Neoplasms	24
Prazosin	Asthma	24
Rotigotine	Rheumatoid arthritis	24
Tolvaptan	Inflammatory Bowel Diseases	24
Ulipristal	Major depressive disorder	24
Ulipristal	Hypercholesterolemia, autosomal dominant, type B	24
Vortioxetine	Autism 15	24
Vortioxetine	Cutaneous T-cell lymphoma	24
XL880	Neuroendocrine neoplasm	24
Azelastine	Hypertension	23
Bicifadine	Inflammatory Bowel Diseases	23
Doxepin	Thyroid Diseases	23
Elafin	Ulcerative colitis	23
Maraviroc	Renal cell carcinoma, nonpapillary	23
Pancuronium	Urticaria	23
Prazosin	Liver Cirrhosis, Biliary	23
Tocainide	Hypertension	23
Tolvaptan	Hypertension	23
Tolvaptan	Depressive Disorder	23
Tolvaptan	Parkinson Disease	23
Vandetanib	Pancreatic adenocarcinoma	23
ALKS 27	Hypersensitivity	22
Azelastine	Pain	22
Buspirone	Myocardial Infarction	22
Clomipramine	Atrial Fibrillation	22
Doxepin	Inflammatory Bowel Diseases	22
Fludrocortisone	Endometriosis	22
Fludrocortisone	Insulin Resistance	22
Haloperidol	Rhinitis, Allergic, Seasonal	22
Nilotinib	Leukemia, Myeloid, Chronic-Phase	22
Pancuronium	Diabetes mellitus type 2	22
Rotigotine	Paroxysmal atrial fibrillation	22
Tocainide	Diabetes mellitus type 2	22
Tolvaptan	Diabetes Mellitus, Type 1	22
Vandetanib	Diabetes mellitus type 2	22
Vortioxetine	Diabetes mellitus type 2	22
AZD6140	Allergic rhinitis	21
Bicifadine	Bipolar affective disorder	21
Cabergoline	Hypersensitivity	21
Caffeine	Diabetes mellitus type 2	21
Carvedilol	Hyperlipidemia, combined, 1	21
Clomipramine	Major depressive disorder	21
Doxepin	Pancreatic adenocarcinoma	21
Droperidol	Urticaria	21
Droperidol	Alzheimer Disease	21
Eluxadoline	Epilepsy	21
Halothane	Diabetes mellitus type 2	21
Halothane	Dermatosis NOS	21
Loxapine	Urticaria	21
Minocycline	Arthritis, Rheumatoid	21
Pancuronium	Dementia	21
Rotigotine	Inflammatory Bowel Diseases	21
Tocainide	Non-Hodgkin lymphoma	21
4-(1H-IMIDAZOL-1-YL)PHENOL	Cutaneous T-cell lymphoma	20
ALKS 27	Parkinson Disease	20
Apremilast	Vascular Diseases	20
Cabergoline	Acromegaly	20
Clomipramine	Prostatic Neoplasms	20
Doxepin	Bipolar affective disorder	20
Doxepin	Arthritis, Rheumatoid	20
Gliclazide	Diabetic Nephropathies	20
Haloperidol	Hypersensitivity	20
KD7040	Cutaneous T-cell lymphoma	20
Minocycline	Kidney Diseases	20
SCV-07	Malaria, Falciparum	20
Sunitinib	Asthma	20
(1H-indol-3-yl)-(2-mercapto-ethoxyimino)-acetic acid	Rhinitis, Allergic, Seasonal	19
Apremilast	Liver Cirrhosis, Biliary	19
Bambuterol	Heart Diseases	19
Cabergoline	Crohn Disease	19
Cabozantinib	Arthritis, Rheumatoid	19
Cabozantinib	Pulmonary Disease, Chronic Obstructive	19
Caffeine	Pulmonary Disease, Chronic Obstructive	19
Chlorphenamine	Inflammatory Bowel Diseases	19
Flavoxate	Pruritus	19
Fludrocortisone	Sarcoidosis	19
Haloperidol	Acromegaly	19
Irbesartan	Rheumatoid arthritis	19
Itopride	Hay fever	19
Lenvatinib	Inflammatory Bowel Diseases	19
Lenvatinib	Diarrhea 8, secretory sodium, congenital	19
Loxapine	Dementia	19
Loxapine	Cardiac arrest	19
Rotigotine	Prostatic Neoplasms	19
Tetracycline	Myocardial Infarction	19
Thiothixene	Multiple Sclerosis	19
Tolvaptan	Bipolar affective disorder	19
Vandetanib	Insulin Resistance	19
Ximelagatran	Kidney Diseases	19
1-[[(1E)-2-(4-CHLOROPHENYL)ETHENYL]SULFONYL]-4-[[1-(4-PYRIDINYL)-4-PIPERIDINYL]METHYL]PIPERAZINE	Acute myocardial ischemia	18
Agmatine	Parkinsonism	18
AZD6140	Pulmonary hypertension, neonatal, susceptibility to	18
Bicifadine	Autism 15	18
Cabergoline	Ulcerative colitis	18
Cabergoline	Renal cell carcinoma, nonpapillary	18
Cabergoline	Kidney Diseases	18
Cilastatin	Diabetic Nephropathies	18
Halothane	Bipolar affective disorder	18
Irbesartan	Epilepsy	18
Itopride	Pruritus	18
Nilotinib	Gastrointestinal stromal tumor	18
Pancuronium	Hay fever	18
SO-101	Bipolar affective disorder	18
Tocainide	Motor Neuron Disease	18
XL184	Gastrointestinal stromal tumor	18
(17beta)-17-(cyanomethyl)-2-methoxyestra-1(10),2,4-trien-3-yl sulfamate	Kidney Diseases	17
(1H-indol-3-yl)-(2-mercapto-ethoxyimino)-acetic acid	Asthma	17
(2R,4R)-N~1~-(4-CHLOROPHENYL)-N~2~-[2-FLUORO-4-(2-OXOPYRIDIN-1(2H)-YL)PHENYL]-4-METHOXYPYRROLIDINE-1,2-DICARBOXAMIDE	Deep venous thrombosis	17
Apremilast	Leukemia, Lymphocytic, Chronic, B-Cell	17
Buspirone	Pain	17
Caffeine	Non-small cell lung carcinoma	17
Caffeine	Dermatosis NOS	17
Carvedilol	Rheumatoid arthritis	17
Chlorphenamine	Alzheimer Disease	17
Cilastatin	Kidney Diseases	17
Gliclazide	Rheumatoid arthritis	17
Gliclazide	Major depressive disorder	17
Haloperidol	Alzheimer Disease	17
Halothane	Diabetic Nephropathies	17
Itopride	Asthma	17
Itopride	Autism 15	17
Lumateperone	Pruritus	17
N-(3-(Aminomethyl)Benzyl)Acetamidine	Arthritis, Rheumatoid	17
Nilotinib	Gastrointestinal Neoplasms	17
NXN-188	Autism 15	17
Prazosin	Major depressive disorder	17
Prazosin	Diabetes Mellitus, Type 1	17
Prazosin	Pain	17
4-(1H-IMIDAZOL-1-YL)PHENOL	Sarcoidosis	16
Apremilast	Hyperlipidemia, combined, 1	16
Buspirone	Osteoarthritis	16
Carvedilol	Inflammatory Bowel Diseases	16
Doxepin	Parkinsonism	16
Droperidol	Paroxysmal atrial fibrillation	16
Ganaxolone	Generalized tonic-clonic seizures	16
Gliclazide	Kidney Diseases	16
Halothane	Prostatic Neoplasms	16
Irbesartan	Bipolar affective disorder	16
Lenvatinib	Asthma	16
Resveratrol	Non-Hodgkin lymphoma	16
Vortioxetine	Pain	16
Vortioxetine	Arteriosclerosis	16
4-(1H-IMIDAZOL-1-YL)PHENOL	Lymphoma, Follicular	15
Aminoguanidine	Sarcoidosis	15
Apremilast	Diabetes Mellitus, Type 1	15
Azelastine	Pruritus	15
Bicifadine	Osteoarthritis	15
Caffeine	Endometriosis	15
Caffeine	Dementia	15
Cinchocaine	Amyotrophic Lateral Sclerosis	15
Clomipramine	Paroxysmal atrial fibrillation	15
CX157	Nicotine Dependence	15
Irbesartan	Osteoarthritis	15
Itopride	Acromegaly	15
Liothyronine	Hyperlipidemia, combined, 1	15
Loxapine	Insomnia	15
OSI-930	Gastrointestinal stromal tumor	15
Resveratrol	Nephrotic syndrome, type 5, with or without ocular abnormalities	15
Rotigotine	Crohn Disease	15
Sulfamethazine	Myocardial Infarction	15
Sulfasalazine	Germinal Center B-Cell-Like Diffuse Large B-Cell Lymphoma	15
Sunitinib	Liver Cirrhosis, Biliary	15
Sunitinib	Hodgkin Disease	15
Telmisartan	Rheumatoid arthritis	15
Ticagrelor	Schizophrenia	15
Tolvaptan	Prostatic Neoplasms	15
Tolvaptan	Kidney Diseases	15
3-SULFOOXY-1H-INDOLE	Diabetes mellitus type 2	14
3-SULFOOXY-1H-INDOLE	Insulin Resistance	14
Apremilast	Cooley's anemia	14
Apremilast	Familial type 3 hyperlipoproteinemia	14
AZD2171	Gastrointestinal stromal tumor	14
Bicifadine	Alzheimer Disease	14
Bromopride	Alzheimer Disease	14
Cabergoline	Pruritus	14
Cabozantinib	Rheumatoid arthritis	14
Caffeine	Status epilepticus	14
Cefalotin	Dermatosis NOS	14
Clomipramine	Liver Cirrhosis, Biliary	14
Doxepin	Autoimmune disease 1	14
Doxycycline	Lymphoma, Large B-Cell, Diffuse	14
Droperidol	Hypersensitivity	14
Fludrocortisone	Primary adrenal insufficiency	14
Haloperidol	Liver Cirrhosis, Biliary	14
Minocycline	Diabetes Mellitus, Type 1	14
Oxaliplatin	Contact Dermatitis	14
Pancuronium	Parkinson Disease	14
Prazosin	Paroxysmal atrial fibrillation	14
Prazosin	Hypothyroidism	14
Rotigotine	Urticaria	14
Tetracycline	Hypothyroidism	14
Tizanidine	Hypertension	14
Tocainide	Nephrotic syndrome, type 5, with or without ocular abnormalities	14
Treprostinil	Non-Hodgkin lymphoma	14
Ulipristal	Insulin Resistance	14
Ulipristal	Familial type 3 hyperlipoproteinemia	14
Vandetanib	Adenocarcinoma, ovarian, somatic, 167000 (3)	14
Vortioxetine	Rheumatoid arthritis	14
Cabergoline	Prostatic Neoplasms	13
Clomipramine	Endometriosis	13
Droperidol	Rhinitis, Allergic, Seasonal	13
Haloperidol	Hodgkin Disease	13
Liothyronine	Nephrotic syndrome, type 5, with or without ocular abnormalities	13
Rotigotine	Arthritis, Rheumatoid	13
Vandetanib	Myocardial Infarction	13
Vortioxetine	Major depressive disorder	13
Vortioxetine	Ulcerative colitis	13
Apremilast	Cerebral ischemia	12
Azelastine	Depressive Disorder	12
Azelastine	Hypercholesterolemia, autosomal dominant, type B	12
Azelastine	Myocardial Infarction	12
Bicifadine	Asthma	12
Bicifadine	Multiple Sclerosis	12
Bicifadine	Dermatosis NOS	12
Cabergoline	Angina pectoris	12
Cabozantinib	Non-Hodgkin lymphoma	12
Caffeine	Kidney Diseases	12
Caffeine	Bronchitis	12
Captopril	Dementia	12
Cefalotin	Neoplasms	12
Clomipramine	Hypercholesterolemia, autosomal dominant, type B	12
Clomipramine	Familial type 3 hyperlipoproteinemia	12
Dexfenfluramine	Pruritus	12
Dinoprost Tromethamine	Diabetes Mellitus, Type 1	12
Doxepin	Pruritus	12
Doxycycline	Schizophrenia	12
Droperidol	Allergic rhinitis	12
Flavoxate	Depressive Disorder	12
Fludrocortisone	Rheumatoid arthritis	12
Gliclazide	Non-small cell lung carcinoma	12
Halothane	Myocardial Infarction	12
Halothane	Osteoarthritis	12
Loxapine	Hypertension	12
Loxapine	Heart Diseases	12
Minocycline	Inflammatory Bowel Diseases	12
Pancuronium	Hypersensitivity	12
Pancuronium	Prostatic Neoplasms	12
Pancuronium	Nicotine Dependence	12
Resveratrol	Head and Neck Neoplasms	12
Rotigotine	Ulcerative colitis	12
Rotigotine	Dermatosis NOS	12
Tocainide	Insulin Resistance	12
Tolvaptan	Asthma	12
Tolvaptan	Schizophrenia	12
Vandetanib	Diabetes Mellitus, Type 1	12
Vortioxetine	Bipolar affective disorder	12
ACP-104	Bipolar affective disorder	11
Cabergoline	Hay fever	11
Cabergoline	Liver Cirrhosis, Biliary	11
Desflurane	Dermatosis NOS	11
Dexfenfluramine	Arteriosclerosis	11
Interferon gamma-1b	Asthma	11
KD7040	Rheumatoid arthritis	11
Loxapine	Acromegaly	11
Oxyphenbutazone	Nephrotic syndrome, type 5, with or without ocular abnormalities	11
Pancuronium	Hypertension	11
Sulfamethazine	Adenocarcinoma, ovarian, somatic, 167000 (3)	11
Sunitinib	Arthritis, Rheumatoid	11
Tetracycline	Hyperlipidemia, combined, 1	11
Thiothixene	Major depressive disorder	11
Tocainide	Adenocarcinoma, ovarian, somatic, 167000 (3)	11
trans-2-hydroxycinnamic acid	Kidney Diseases	11
Vandetanib	Head and Neck Neoplasms	11
YSIL6	Malaria, Falciparum	11
4-(1H-IMIDAZOL-1-YL)PHENOL	Non-Hodgkin lymphoma	10
ACP-104	Alzheimer Disease	10
ALKS 27	Parkinsonism	10
Bepridil	Heart Diseases	10
Cabergoline	Hypotension	10
Cabergoline	Major depressive disorder	10
Cabergoline	Cardiac arrest	10
Caffeine	Parkinson Disease	10
Caffeine	Crohn Disease	10
Caffeine	Nicotine Dependence	10
Carvedilol	Hypercholesterolemia, autosomal dominant, type B	10
Cirazoline	Bipolar affective disorder	10
Droperidol	Hypotension	10
Eluxadoline	Hyperlipidemia, combined, 1	10
Flavoxate	Hay fever	10
Haloperidol	Status epilepticus	10
Haloperidol	Peripheral Arterial Disease	10
Halothane	Arteriosclerosis	10
Lenvatinib	Hypertension	10
Loxapine	Hypersensitivity	10
Maraviroc	Hyperlipidemia, combined, 1	10
Mianserin	Osteoarthritis	10
Minocycline	Colitis, Ulcerative	10
Nalbuphine	Disorder of endocrine system	10
Prazosin	Pulmonary Disease, Chronic Obstructive	10
Thiocoumarin	Cutaneous T-cell lymphoma	10
Thiothixene	Parkinson Disease	10
Thiothixene	Pancreatic adenocarcinoma	10
Thiothixene	Lupus Erythematosus, Systemic	10
Trastuzumab	Non-small cell lung carcinoma	10
Vandetanib	Nephrotic syndrome, type 5, with or without ocular abnormalities	10
Vortioxetine	Hyperlipidemia, combined, 1	10
[5-HYDROXY-2-(4-HYDROXYPHENYL)-1-BENZOFURAN-7-YL]ACETONITRILE	Disorder of endocrine system	9
1-(2-nitrophenyl)-2,2,2-trifluoroethyl]-arsenocholine	Dementia	9
6-Nitroindazole	Arthritis, Rheumatoid	9
Apremilast	Asthma	9
Apremilast	Prostatic Neoplasms	9
Apremilast	Renal cell carcinoma, nonpapillary	9
Azelastine	Asthma	9
Azelastine	Epilepsy	9
Bicifadine	Depressive Disorder	9
Bicifadine	Arthritis, Rheumatoid	9
Buspirone	Status epilepticus	9
Buspirone	Autoimmune disease 1	9
Cabergoline	Diabetes Mellitus, Type 1	9
Caffeine	Hypertension	9
Caffeine	Rheumatoid arthritis	9
Clomipramine	Hyperlipidemia, combined, 1	9
Clomipramine	Heart Diseases	9
Doxepin	Renal cell carcinoma, nonpapillary	9
Elafin	Colitis, Ulcerative	9
Ethotoin	Hyperlipidemia, combined, 1	9
Flavoxate	Urticaria	9
Fludrocortisone	Hypertension	9
Gliclazide	Dermatosis NOS	9
Halothane	Alzheimer Disease	9
Halothane	Schizophrenia	9
Lumateperone	Parkinson Disease	9
Maraviroc	Inflammatory Bowel Diseases	9
Memantine	Asthma	9
Pancuronium	Allergic rhinitis	9
Pancuronium	Leukemia, Lymphocytic, Chronic, B-Cell	9
Paramethadione	Hyperlipidemia, combined, 1	9
Pramipexole	Acromegaly	9
Resveratrol	Myocardial Infarction	9
Rizatriptan	Schizophrenia	9
Rotigotine	Diabetes Mellitus, Type 1	9
Rotigotine	Multiple Sclerosis	9
SO-101	Hypersensitivity	9
Sulfasalazine	Cutaneous T-cell lymphoma	9
Sulfasalazine	Diabetes Mellitus, Type 1	9
Telmisartan	Asthma	9
Telmisartan	Liver Cirrhosis, Biliary	9
Tocainide	Multiple Sclerosis	9
Tolvaptan	Diabetes mellitus type 2	9
Vortioxetine	Crohn Disease	9
XL228	Diabetes mellitus type 2	9
YSIL6	Hay fever	9
Azimilide	Ventricular fibrillation	8
Bepridil	Bipolar affective disorder	8
Caffeine	Ulcerative colitis	8
Caffeine	Leukemia, Myeloid, Chronic-Phase	8
Caffeine	Cerebral ischemia	8
Halothane	Paroxysmal atrial fibrillation	8
Lenvatinib	Myocardial Infarction	8
Loxapine	Depressive Disorder	8
Lumateperone	Bipolar affective disorder	8
Mianserin	Prostatic Neoplasms	8
Oxyphenbutazone	Dermatosis NOS	8
Propiomazine	Rhinitis, Allergic, Seasonal	8
Resveratrol	Diabetes mellitus type 2	8
Sulfamethazine	Psoriasis	8
Thiothixene	Depressive Disorder	8
Tolvaptan	Hyperlipidemia, combined, 1	8
Trastuzumab	Neoplasms	8
Ulipristal	Diabetes Mellitus, Type 1	8
(2S,3S)-3-{3-[2-chloro-4-(methylsulfonyl)phenyl]-1,2,4-oxadiazol-5-yl}-1-cyclopentylidene-4-cyclopropyl-1-fluorobutan-2-amine	Diabetes mellitus type 2	7
3-SULFOOXY-1H-INDOLE	Psoriasis	7
3-SULFOOXY-1H-INDOLE	Hypothyroidism	7
4-({4-[(6-CHLORO-1-BENZOTHIEN-2-YL)SULFONYL]-2-OXOPIPERAZIN-1-YL}METHYL)BENZENECARBOXIMIDAMIDE	Acute myocardial ischemia	7
4-(1H-IMIDAZOL-1-YL)PHENOL	Arthritis, Rheumatoid	7
Buspirone	Diabetes Mellitus, Type 1	7
Cabozantinib	Liver Cirrhosis, Biliary	7
Cinchocaine	Motor Neuron Disease	7
Dexchlorpheniramine maleate	Bipolar affective disorder	7
Halothane	Rhinitis, Allergic, Seasonal	7
Hydrocortisone	Schizophrenia	7
Interferon gamma-1b	Peripheral Arterial Disease	7
Irbesartan	Pulmonary Disease, Chronic Obstructive	7
Itopride	Bipolar affective disorder	7
Itopride	Allergic rhinitis	7
KD7040	Asthma	7
Loxapine	Bipolar affective disorder	7
Oxcarbazepine	Hyperlipidemia, combined, 1	7
Oxyphenbutazone	Diabetes Mellitus, Type 1	7
Prazosin	Thyroid Diseases	7
Propiomazine	Pruritus	7
Rizatriptan	Nicotine Dependence	7
S-Ethylisothiourea	Rheumatoid arthritis	7
Sulfasalazine	Prostatic Neoplasms	7
Thiocoumarin	Asthma	7
Thiothixene	Arthritis, Rheumatoid	7
Treprostinil	Arthritis, Rheumatoid	7
XL184	Idiopathic hypereosinophilic syndrome	7
(3AS,4R,9BR)-4-(4-HYDROXYPHENYL)-1,2,3,3A,4,9B-HEXAHYDROCYCLOPENTA[C]CHROMEN-8-OL	Disorder of endocrine system	6
4-(1H-IMIDAZOL-1-YL)PHENOL	Multiple Sclerosis	6
4-(Aminosulfonyl)-N-[(2,4-Difluorophenyl)Methyl]-Benzamide	Kidney Diseases	6
7-(aminomethyl)-6-(2-chlorophenyl)-1-methyl-1H-benzimidazole-5-carbonitrile	Diabetes mellitus type 2	6
ACP-104	Pruritus	6
Apremilast	Allergic rhinitis	6
Apremilast	Familial cold-induced inflammatory syndrome 1, 120100 (3)	6
Apremilast	Non-small cell lung carcinoma	6
Bicifadine	Parkinsonism	6
Bromopride	Schizophrenia	6
Buspirone	Epilepsy	6
Cabozantinib	Asthma	6
Cabozantinib	Inflammatory Bowel Diseases	6
Cabozantinib	Osteoarthritis	6
Caffeine	Osteoarthritis	6
Caffeine	Autoimmune disease 1	6
Caffeine	Urticaria	6
Carvedilol	Non-Hodgkin lymphoma	6
Carvedilol	Pain	6
Celiprolol	Prostatic Neoplasms	6
Cinchocaine	Epilepsy	6
Desflurane	Kidney Diseases	6
Dinoprost Tromethamine	Pulmonary hypertension, neonatal, susceptibility to	6
Dinoprost Tromethamine	Diabetic Nephropathies	6
Diphemanil Methylsulfate	Hypersensitivity	6
Doxepin	Myocardial Infarction	6
Doxepin	Atrial Fibrillation	6
Doxepin	Pulmonary Disease, Chronic Obstructive	6
Eluxadoline	Lupus Erythematosus, Systemic	6
Eluxadoline	Lymphoma, Large B-Cell, Diffuse	6
Haloperidol	Contact Dermatitis	6
Halothane	Inflammatory Bowel Diseases	6
KD7040	Arthritis, Rheumatoid	6
Lenvatinib	Crohn Disease	6
N-(3-(Aminomethyl)Benzyl)Acetamidine	Non-Hodgkin lymphoma	6
N-(3-(Aminomethyl)Benzyl)Acetamidine	Multiple Sclerosis	6
Oxcarbazepine	Nephrotic syndrome, type 5, with or without ocular abnormalities	6
Propiomazine	Alzheimer Disease	6
Quinidine barbiturate	Amyotrophic Lateral Sclerosis	6
Rimonabant	Diabetes mellitus type 2	6
Rizatriptan	Endometriosis	6
Salbutamol	Diabetes mellitus type 2	6
Simeprevir	Nephrotic syndrome, type 5, with or without ocular abnormalities	6
Sunitinib	Acute promyelocytic leukemia	6
Thiothixene	Psoriasis	6
Tocainide	Kidney Diseases	6
Tolvaptan	Renal cell carcinoma, nonpapillary	6
Trastuzumab	Dermatosis NOS	6
Treprostinil	Diabetes mellitus type 2	6
Vandetanib	Rheumatoid arthritis	6
(1H-indol-3-yl)-(2-mercapto-ethoxyimino)-acetic acid	Familial cold-induced inflammatory syndrome 1, 120100 (3)	5
1-[2-(S)-AMINO-3-BIPHENYL-4-YL-PROPIONYL]-PYRROLIDINE-2-(S)-CARBONITRILE	Diabetes mellitus type 2	5
3-SULFOOXY-1H-INDOLE	Hypertension	5
3-SULFOOXY-1H-INDOLE	Myocardial Infarction	5
3-SULFOOXY-1H-INDOLE	Kidney Diseases	5
3-SULFOOXY-1H-INDOLE	Multiple Sclerosis	5
4-(1H-IMIDAZOL-1-YL)PHENOL	Inflammatory Bowel Diseases	5
5-HYDROXY-3-[(1R)-1-(1H-PYRROL-2-YL)ETHYL]-2H-INDOL-2-ONE	Osteoarthritis	5
Bicifadine	Hypertension	5
Buspirone	Ulcerative colitis	5
Buspirone	Arthritis, Rheumatoid	5
Buspirone	Multiple Sclerosis	5
Buspirone	Psoriasis	5
Cabergoline	Hyperlipidemia, combined, 1	5
Cabozantinib	Myocardial Infarction	5
Caffeine	Autism 15	5
Celiprolol	Familial type 3 hyperlipoproteinemia	5
Clocortolone	Non-Hodgkin lymphoma	5
Clomipramine	Hypertension	5
Doxepin	Rheumatoid arthritis	5
Doxepin	Angina pectoris	5
Flavoxate	Schizophrenia	5
Fludrocortisone	Hyperaldosteronism, familial, type IV	5
Gliclazide	Adenocarcinoma, ovarian, somatic, 167000 (3)	5
Gliclazide	Nephrotic syndrome, type 5, with or without ocular abnormalities	5
Haloperidol	Dermatosis NOS	5
Halothane	Multiple Sclerosis	5
Hydrocortisone	Status epilepticus	5
Liothyronine	Kidney Diseases	5
Maraviroc	Cutaneous T-cell lymphoma	5
Maraviroc	Psoriasis	5
Maraviroc	Liver Cirrhosis, Biliary	5
N-(3-(Aminomethyl)Benzyl)Acetamidine	Cutaneous T-cell lymphoma	5
N-(3-(Aminomethyl)Benzyl)Acetamidine	Lymphoma, Follicular	5
Prazosin	Hypotension	5
Quinidine barbiturate	Status epilepticus	5
Rimonabant	Diabetes Mellitus, Type 1	5
Rimonabant	Schizophrenia	5
Rimonabant	Hyperlipidemia, combined, 1	5
S-Ethylisothiourea	Cutaneous T-cell lymphoma	5
Salbutamol	Hypertension	5
Simeprevir	Hyperkeratosis	5
SO-101	Major depressive disorder	5
Sulfamethazine	Diabetes Mellitus, Type 1	5
Sulfasalazine	Leukemia, Lymphocytic, Chronic, B-Cell	5
Sunitinib	Head and Neck Neoplasms	5
Testosterone	Head and Neck Neoplasms	5
Tetracycline	Dermatosis NOS	5
Tetracycline	Multiple Sclerosis	5
THIENO[3,2-B]PYRIDINE-2-SULFONIC ACID [2-OXO-1-(1H-PYRROLO[2,3-C]PYRIDIN-2-YLMETHYL)-PYRROLIDIN-3-YL]-AMIDE	Acute myocardial ischemia	5
Thiothixene	Pneumonia	5
Thiothixene	Insulin Resistance	5
Ticagrelor	Osteoarthritis	5
Trastuzumab	Adenocarcinoma, ovarian, somatic, 167000 (3)	5
Trastuzumab	Prostatic Neoplasms	5
Treprostinil	Arteriosclerosis	5
Treprostinil	Pain	5
Ulipristal	Hyperlipidemia, combined, 1	5
Ulipristal	Amyotrophic Lateral Sclerosis	5
Vandetanib	Leukemia, Lymphocytic, Chronic, B-Cell	5
Vandetanib	Arthritis, Rheumatoid	5
Vortioxetine	Osteoarthritis	5
Vortioxetine	Nicotine Dependence	5
2-[4-(DIMETHYLAMINO)PHENYL]-6-HYDROXY-3-METHYL-1,3-BENZOTHIAZOL-3-IUM	Dementia	4
3-SULFOOXY-1H-INDOLE	Diabetes Mellitus, Type 1	4
3-SULFOOXY-1H-INDOLE	Thyroid Diseases	4
ALKS 27	Major depressive disorder	4
Apremilast	Ulcerative colitis	4
Asimadoline	Endometriosis	4
Asimadoline	Disorder of endocrine system	4
Azelastine	Diarrhea 8, secretory sodium, congenital	4
Bicifadine	Diabetes mellitus type 2	4
Bromopride	Bipolar affective disorder	4
Cabergoline	Bipolar affective disorder	4
Cabergoline	Rhinitis, Allergic, Seasonal	4
Cabergoline	Psoriasis	4
Cabergoline	Non-small cell lung carcinoma	4
Cabozantinib	Renal cell carcinoma, nonpapillary	4
Caffeine	Leukemia, Lymphocytic, Chronic, B-Cell	4
Caffeine	Hyperlipidemia, combined, 1	4
Caffeine	Schizophrenia	4
Caffeine	Psoriasis	4
Caffeine	Alzheimer Disease	4
Captopril	Psoriasis	4
Captopril	Diabetic Nephropathies	4
Carvedilol	Myocardial Infarction	4
Cefalotin	Nephrotic syndrome, type 5, with or without ocular abnormalities	4
Cefalotin	Hypothyroidism	4
Cefalotin	Non-Hodgkin lymphoma	4
Celiprolol	Hypercholesterolemia, autosomal dominant, type B	4
Celiprolol	Adenocarcinoma, ovarian, somatic, 167000 (3)	4
Chlorphenamine	Asthma	4
Chlorphenamine	Bipolar affective disorder	4
Cirazoline	Major depressive disorder	4
Clocortolone	Autoimmune disease 1	4
Clomipramine	Pruritus	4
Clomipramine	Dermatosis NOS	4
Clomipramine	Nephrotic syndrome, type 5, with or without ocular abnormalities	4
Clomipramine	Diarrhea 8, secretory sodium, congenital	4
Desflurane	Myocardial Infarction	4
Dexfenfluramine	Asthma	4
Dexfenfluramine	Atrial Fibrillation	4
Dinoprost Tromethamine	Diabetes mellitus type 2	4
Dinoprost Tromethamine	Prostatic Neoplasms	4
Doxycycline	Asthma	4
Epicept NP-1	Schizophrenia	4
Ethotoin	Motor Neuron Disease	4
Haloperidol	Diarrhea 8, secretory sodium, congenital	4
Halothane	Asthma	4
Halothane	Status epilepticus	4
KD7040	Anterior uveitis	4
Lenvatinib	Ulcerative colitis	4
LFA703	Hypercholesterolemia, autosomal dominant, type B	4
Liothyronine	Myocardial Infarction	4
Lumateperone	Urticaria	4
Maraviroc	Schizophrenia	4
Maraviroc	Kidney Diseases	4
Mianserin	Paroxysmal atrial fibrillation	4
Mianserin	Diabetes Mellitus, Type 1	4
N-(3-Phenyl-2-Sulfanylpropanoyl)Phenylalanylalanine	Diabetes mellitus type 2	4
Oxaliplatin	Bronchitis	4
Oxaliplatin	Parkinson Disease	4
Oxcarbazepine	Amyotrophic Lateral Sclerosis	4
Oxcarbazepine	Hypercholesterolemia, autosomal dominant, type B	4
Oxyphenbutazone	Hypertension	4
Oxyphenbutazone	Adenocarcinoma, ovarian, somatic, 167000 (3)	4
Oxyphenbutazone	Psoriasis	4
Propiomazine	Asthma	4
Pyridoxine	Musculoskeletal Diseases	4
Quinidine barbiturate	Epilepsy	4
Rotigotine	Liver Cirrhosis, Biliary	4
Rotigotine	Musculoskeletal Diseases	4
Sulfamethazine	Hypertension	4
Sulfamethazine	Neoplasms	4
Sunitinib	Systemic mastocytosis with associated clonal, hematologic non-mast-cell lineage disease	4
Sunitinib	Diarrhea 8, secretory sodium, congenital	4
Telmisartan	Epilepsy	4
Testosterone	Disorder of endocrine system	4
Tetracycline	Diabetes Mellitus, Type 1	4
Tetracycline	Crohn Disease	4
Thiothixene	Dermatosis NOS	4
Thiothixene	Hypercholesterolemia, autosomal dominant, type B	4
Ticagrelor	Pulmonary Disease, Chronic Obstructive	4
Timolol	Hypercholesterolemia, autosomal dominant, type B	4
Tolvaptan	Epilepsy	4
Tolvaptan	Diarrhea 8, secretory sodium, congenital	4
Tolvaptan	Arthritis, Rheumatoid	4
Tolvaptan	Familial type 3 hyperlipoproteinemia	4
Treprostinil	Hyperlipidemia, combined, 1	4
Ulipristal	Myocardial Infarction	4
Zidovudine	Kidney Diseases	4
(S)-N-(4-carbamimidoylbenzyl)-1-(3-cyclopentylpropanoyl)pyrrolidine-2-carboxamide	Acute myocardial ischemia	3
[5-HYDROXY-2-(4-HYDROXYPHENYL)-1-BENZOFURAN-7-YL]ACETONITRILE	Endometriosis	3
3-SULFOOXY-1H-INDOLE	Adenocarcinoma, ovarian, somatic, 167000 (3)	3
4-({4-[(6-CHLORO-1-BENZOTHIEN-2-YL)SULFONYL]-2-OXOPIPERAZIN-1-YL}METHYL)BENZENECARBOXIMIDAMIDE	Deep venous thrombosis	3
4-(1H-IMIDAZOL-1-YL)PHENOL	Crohn Disease	3
4-(Aminosulfonyl)-N-[(4-Fluorophenyl)Methyl]-Benzamide	Kidney Diseases	3
5-(5-chloro-7H-pyrrolo[2,3-d]pyrimidin-4-yl)-4,5,6,7-tetrahydro-1H-imidazo[4,5-c]pyridine	Acute promyelocytic leukemia	3
5-chloro-N-({(5S)-2-oxo-3-[4-(3-oxomorpholin-4-yl)phenyl]-1,3-oxazolidin-5-yl}methyl)thiophene-2-carboxamide	Deep venous thrombosis	3
5-chloro-N-({(5S)-2-oxo-3-[4-(3-oxomorpholin-4-yl)phenyl]-1,3-oxazolidin-5-yl}methyl)thiophene-2-carboxamide	Acute myocardial ischemia	3
6-Nitroindazole	Cutaneous T-cell lymphoma	3
Allylestrenol	Disorder of endocrine system	3
Aminoguanidine	Diabetes mellitus type 2	3
Azelastine	Major depressive disorder	3
Bicifadine	Rheumatoid arthritis	3
Bromopride	Autism 15	3
Buspirone	Hyperlipidemia, combined, 1	3
Buspirone	Rheumatoid arthritis	3
Cabergoline	Hypercholesterolemia, autosomal dominant, type B	3
Cabozantinib	Adenocarcinoma, ovarian, somatic, 167000 (3)	3
Caffeine	Multiple Sclerosis	3
Caffeine	Head and Neck Neoplasms	3
Caffeine	Diarrhea 8, secretory sodium, congenital	3
Caffeine	Hodgkin Disease	3
Captopril	Hypertension	3
Captopril	Myocardial Infarction	3
Captopril	Hyperkeratosis	3
Captopril	Hyperlipidemia, combined, 1	3
Captopril	Hypercholesterolemia, autosomal dominant, type B	3
Carvedilol	Autism 15	3
Carvedilol	Paroxysmal atrial fibrillation	3
Carvedilol	Acromegaly	3
Carvedilol	Depressive Disorder	3
Carvedilol	Heart Diseases	3
Carvedilol	Nephrotic syndrome, type 5, with or without ocular abnormalities	3
Carvedilol	Musculoskeletal Diseases	3
Cefalotin	Insulin Resistance	3
Celiprolol	Schizophrenia	3
Chlorphenamine	Schizophrenia	3
Chlorphenamine	Major depressive disorder	3
Cirazoline	Asthma	3
Clocortolone	Arthritis, Rheumatoid	3
Clocortolone	Musculoskeletal Diseases	3
Clocortolone	Sarcoidosis	3
Clofarabine	Multiple Sclerosis	3
Clomipramine	Schizophrenia	3
Clomipramine	Bipolar affective disorder	3
Clomipramine	Diabetes mellitus type 2	3
Clomipramine	Diabetes Mellitus, Type 1	3
Clomipramine	Pain	3
CTA018	Rickets	3
Cyanamide	Kidney Diseases	3
CYT006-AngQb	Diabetic Nephropathies	3
Cytarabine	Head and Neck Neoplasms	3
Desflurane	Adenocarcinoma, ovarian, somatic, 167000 (3)	3
Desflurane	Diabetic Nephropathies	3
Desflurane	Epilepsy	3
Dexchlorpheniramine maleate	Major depressive disorder	3
Dexchlorpheniramine maleate	Diabetes mellitus type 2	3
Dexfenfluramine	Schizophrenia	3
Dexfenfluramine	Rhinitis, Allergic, Seasonal	3
Doxepin	Parkinson Disease	3
Doxepin	Crohn Disease	3
Doxepin	Diarrhea 8, secretory sodium, congenital	3
Droperidol	Bipolar affective disorder	3
Droperidol	Autism 15	3
Droperidol	Depressive Disorder	3
Eluxadoline	Diabetes Mellitus, Type 1	3
Eluxadoline	Rheumatoid arthritis	3
Etanercept	Rheumatic disease of heart valve	3
Flavoxate	Bipolar affective disorder	3
Gliclazide	Hypertension	3
Gliclazide	Neoplasms	3
Haloperidol	Arteriosclerosis	3
Halothane	Diabetes Mellitus, Type 1	3
Halothane	Psoriasis	3
Histrelin	Precocious puberty	3
Liothyronine	Diabetes Mellitus, Type 1	3
MDV3100	Male hypogonadism	3
Memantine	Rheumatoid arthritis	3
Memantine	Hypertension	3
Mianserin	Ulcerative colitis	3
Mianserin	Liver Cirrhosis, Biliary	3
Minocycline	Alzheimer Disease	3
Nafarelin	Endometriosis	3
Nilotinib	Head and Neck Neoplasms	3
Oxaliplatin	Prostatic Neoplasms	3
Oxaliplatin	Non-Hodgkin lymphoma	3
Oxcarbazepine	Kidney Diseases	3
Oxcarbazepine	Hyperkeratosis	3
Oxyphenbutazone	Myocardial Infarction	3
Oxyphenbutazone	Hyperkeratosis	3
Oxyphenbutazone	Neoplasms	3
Pancuronium	Diabetes Mellitus, Type 1	3
Propiomazine	Hypersensitivity	3
Propiomazine	Hypotension	3
Ranitidine	Hyperlipidemia, combined, 1	3
Rimonabant	Ulcerative colitis	3
Rimonabant	Inflammatory Bowel Diseases	3
Rimonabant	Epilepsy	3
Rimonabant	Renal cell carcinoma, nonpapillary	3
Rimonabant	Liver Cirrhosis, Biliary	3
Rotigotine	Osteoarthritis	3
S-Ethylisothiourea	Non-Hodgkin lymphoma	3
S-Ethylisothiourea	Lymphoma, Follicular	3
Salbutamol	Schizophrenia	3
SO-101	Depressive Disorder	3
Sulfasalazine	Adenocarcinoma, ovarian, somatic, 167000 (3)	3
Sulfasalazine	Acute promyelocytic leukemia	3
Sunitinib	Diabetes mellitus type 2	3
Sunitinib	Heart Diseases	3
Telmisartan	Depressive Disorder	3
Telmisartan	Major depressive disorder	3
Telmisartan	Endometriosis	3
Thiocoumarin	Non-Hodgkin lymphoma	3
Thiorphan	Diabetes mellitus type 2	3
Thiothixene	Musculoskeletal Diseases	3
Thiothixene	Peripheral Arterial Disease	3
Thiothixene	Rhinitis, Allergic, Seasonal	3
Ticagrelor	Hypertension	3
Ticagrelor	Kidney Diseases	3
Ticagrelor	Epilepsy	3
Ticagrelor	Inflammatory Bowel Diseases	3
Ticagrelor	Pain	3
Ticagrelor	Multiple Sclerosis	3
Ticagrelor	Crohn Disease	3
Timolol	Asthma	3
Timolol	Hyperlipidemia, combined, 1	3
Tizanidine	Asthma	3
Tocainide	Diabetes Mellitus, Type 1	3
Tocainide	Major depressive disorder	3
Tolvaptan	Ulcerative colitis	3
Tolvaptan	Myocardial Infarction	3
Tolvaptan	Thyroid Diseases	3
Treprostinil	Rheumatoid arthritis	3
Treprostinil	Epilepsy	3
Vandetanib	Epilepsy	3
Vandetanib	Allergic rhinitis	3
Vortioxetine	Hypertension	3
Zidovudine	Hyperkeratosis	3
1-(4-HEXYLPHENYL)PROP-2-EN-1-ONE	Thyroid Diseases	2
1-(6-CYANO-3-PYRIDYLCARBONYL)-5',8'-DIFLUOROSPIRO[PIPERIDINE-4,2'(1'H)-QUINAZOLINE]-4'-AMINE	Asthma	2
2-[2-(2-Cyclohexyl-2-Guanidino-Acetylamino)-Acetylamino]-N-(3-Mercapto-Propyl)-Propionamide	Familial cold-induced inflammatory syndrome 1, 120100 (3)	2
3-SULFOOXY-1H-INDOLE	Hyperkeratosis	2
3-SULFOOXY-1H-INDOLE	Dermatosis NOS	2
4-(1H-IMIDAZOL-1-YL)PHENOL	Anterior uveitis	2
4-(1H-IMIDAZOL-1-YL)PHENOL	Lupus Erythematosus, Systemic	2
4-(1H-IMIDAZOL-1-YL)PHENOL	Asthma	2
4-{[(1R,2S)-1,2-dihydroxy-2-methyl-3-(4-nitrophenoxy)propyl]amino}-2-(trifluoromethyl)benzonitrile	Male hypogonadism	2
4-METHYL-N-METHYL-N-(2-PHENYL-2H-PYRAZOL-3-YL)BENZENESULFONAMIDE	Epilepsy	2
4-Sulfonamide-[1-(4-Aminobutane)]Benzamide	Kidney Diseases	2
ALKS 27	Asthma	2
ALKS 27	Hay fever	2
Apremilast	Schizophrenia	2
Azelastine	Arteriosclerosis	2
Bepridil	Atrial Fibrillation	2
Beta-(2-Naphthyl)-Alanine	Acute myocardial ischemia	2
Bicifadine	Lupus Erythematosus, Systemic	2
Bromopride	Parkinson Disease	2
Bromopride	Hypersensitivity	2
Buspirone	Schizophrenia	2
Buspirone	Hypertension	2
Buspirone	Alzheimer Disease	2
Buspirone	Asthma	2
Cabergoline	Parkinsonism	2
Cabergoline	Urticaria	2
Cabergoline	Alzheimer Disease	2
Cabozantinib	Hypertension	2
Cabozantinib	Neuroendocrine neoplasm	2
Cabozantinib	Arteriosclerosis	2
Cabozantinib	Prostatic Neoplasms	2
Cabozantinib	Schizophrenia	2
Cabozantinib	Pain	2
Caffeine	Prostatic Neoplasms	2
Caffeine	Non-Hodgkin lymphoma	2
Caffeine	Heart Diseases	2
Caffeine	Cutaneous T-cell lymphoma	2
Caffeine	Inflammatory Bowel Diseases	2
Caffeine	Bipolar affective disorder	2
Caffeine	Pain	2
Caffeine	Endometrial carcinoma	2
Caffeine	Myocardial Infarction	2
Captopril	Diabetes mellitus type 2	2
Captopril	Kidney Diseases	2
Captopril	Adenocarcinoma, ovarian, somatic, 167000 (3)	2
Captopril	Arthritis, Rheumatoid	2
Captopril	Nephrotic syndrome, type 5, with or without ocular abnormalities	2
Captopril	Non-Hodgkin lymphoma	2
Captopril	Heart Diseases	2
Captopril	Alzheimer Disease	2
Carvedilol	Schizophrenia	2
Carvedilol	Parkinson Disease	2
Carvedilol	Asthma	2
Carvedilol	Liver Cirrhosis, Biliary	2
Carvedilol	Renal cell carcinoma, nonpapillary	2
Carvedilol	Pulmonary Disease, Chronic Obstructive	2
Carvedilol	Amyotrophic Lateral Sclerosis	2
Carvedilol	Alzheimer Disease	2
Carvedilol	Endometrial carcinoma	2
Carvedilol	Hypothyroidism	2
Carvedilol	Peripheral Arterial Disease	2
Carvedilol	Thyroid Diseases	2
Carvedilol	Nicotine Dependence	2
Carvedilol	Dermatitis, Atopic	2
Cefalotin	Diabetes Mellitus, Type 1	2
Cefalotin	Adenocarcinoma, ovarian, somatic, 167000 (3)	2
Cefalotin	Myocardial Infarction	2
Cefalotin	Kidney Diseases	2
Celiprolol	Parkinson Disease	2
Chlorambucil	Ulcerative colitis	2
Chlorphenamine	Depressive Disorder	2
Clocortolone	Multiple Sclerosis	2
Clocortolone	Primary adrenal insufficiency	2
Clocortolone	Crohn Disease	2
Clocortolone	Multiple Myeloma	2
Clocortolone	Nephrotic syndrome, type 5, with or without ocular abnormalities	2
Clocortolone	Rheumatoid arthritis	2
Clomipramine	Kidney Diseases	2
Clomipramine	Myocardial Infarction	2
Clomipramine	Epilepsy	2
Clomipramine	Psoriasis	2
Clomipramine	Hyperkeratosis	2
Clomipramine	Amyotrophic Lateral Sclerosis	2
Desflurane	Diabetes mellitus type 2	2
Desflurane	Neoplasms	2
Desflurane	Nephrotic syndrome, type 5, with or without ocular abnormalities	2
Desflurane	Hypothyroidism	2
Desflurane	Multiple Sclerosis	2
Dexchlorpheniramine maleate	Pruritus	2
Dexchlorpheniramine maleate	Osteoarthritis	2
Dinoprost Tromethamine	Hypertension	2
Diphemanil Methylsulfate	Allergic rhinitis	2
Doxepin	Asthma	2
Doxepin	Ulcerative colitis	2
Doxepin	Liver Cirrhosis, Biliary	2
Doxepin	Non-Hodgkin lymphoma	2
Doxepin	Musculoskeletal Diseases	2
Doxepin	Amyotrophic Lateral Sclerosis	2
Doxycycline	Crohn Disease	2
Doxycycline	Ulcerative colitis	2
Etanercept	Ulcerative colitis	2
Etanercept	Arthritis, Rheumatoid	2
Flavoxate	Parkinson Disease	2
Flavoxate	Major depressive disorder	2
Fludrocortisone	Arthritis, Rheumatoid	2
Ganaxolone	Epilepsy	2
Gliclazide	Insulin Resistance	2
Gliclazide	Schizophrenia	2
Haloperidol	Asthma	2
Haloperidol	Thyroid Diseases	2
Halothane	Kidney Diseases	2
Halothane	Rheumatoid arthritis	2
Halothane	Liver Cirrhosis, Biliary	2
Halothane	Thyroid Diseases	2
Halothane	Nicotine Dependence	2
Halothane	Autism 15	2
Halothane	Crohn Disease	2
Halothane	Parkinson Disease	2
Histrelin	Prostatic Neoplasms	2
Hydrocortisone	Depressive Disorder	2
Hydrocortisone	Hypogonadotropic hypogonadism 7 with or without anosmia	2
intranasal apomorphine	Bipolar affective disorder	2
intranasal apomorphine	Autism 15	2
intranasal apomorphine	Acromegaly	2
intranasal apomorphine	Hypersensitivity	2
intranasal apomorphine	Urticaria	2
Irbesartan	Depressive Disorder	2
Irbesartan	Major depressive disorder	2
Irbesartan	Endometriosis	2
Irbesartan	Arteriosclerosis	2
Irbesartan	Atrial Fibrillation	2
KD7040	Lupus Erythematosus, Systemic	2
KD7040	Crohn Disease	2
Liothyronine	Diabetes mellitus type 2	2
Liothyronine	Heart Diseases	2
Loxapine	Autism 15	2
Loxapine	Asthma	2
Loxapine	Hay fever	2
Lumateperone	Hay fever	2
Memantine	Parkinsonism	2
Memantine	Lupus Erythematosus, Systemic	2
Methyldopa	Autism 15	2
Mianserin	Schizophrenia	2
Mianserin	Inflammatory Bowel Diseases	2
N-(3-(Aminomethyl)Benzyl)Acetamidine	Crohn Disease	2
Nalbuphine	Endometriosis	2
Nilotinib	Hodgkin Disease	2
Oxcarbazepine	Familial type 3 hyperlipoproteinemia	2
Oxyphenbutazone	Multiple Sclerosis	2
Oxyphenbutazone	Insulin Resistance	2
Pancuronium	Asthma	2
Pancuronium	Bipolar affective disorder	2
Pargyline	Parkinsonism	2
Phenmetrazine	Major depressive disorder	2
Pramipexole	Heart Diseases	2
Prazosin	Epilepsy	2
Prazosin	Kidney Diseases	2
Prazosin	Nephrotic syndrome, type 5, with or without ocular abnormalities	2
Probenecid	Hyperkeratosis	2
Propiomazine	Urticaria	2
Propiomazine	Major depressive disorder	2
Pyridoxine	Bronchitis	2
Pyridoxine	orbit (eye disorders)	2
Quinidine barbiturate	Motor Neuron Disease	2
Reserpine	Leukemia, Myeloid, Chronic-Phase	2
Resveratrol	Familial type 3 hyperlipoproteinemia	2
Resveratrol	Hyperlipidemia, combined, 1	2
Rimonabant	Hypertension	2
Rimonabant	Crohn Disease	2
Rimonabant	Prostatic Neoplasms	2
Rimonabant	Lymphoma, Large B-Cell, Diffuse	2
Rizatriptan	Bipolar affective disorder	2
Rizatriptan	Hypertension	2
Rizatriptan	Diabetes mellitus type 2	2
Rotigotine	Psoriasis	2
S-Ethylisothiourea	Multiple Sclerosis	2
S-Ethylisothiourea	Dermatitis, Atopic	2
S-Ethylisothiourea	Asthma	2
Salbutamol	Liver Cirrhosis, Biliary	2
Salbutamol	Hypercholesterolemia, autosomal dominant, type B	2
Salbutamol	Adenocarcinoma, ovarian, somatic, 167000 (3)	2
Simeprevir	Diabetes mellitus type 2	2
Simeprevir	Diabetes Mellitus, Type 1	2
Sulfamethazine	Diabetic Nephropathies	2
Sulfamethazine	Hypothyroidism	2
Sulfasalazine	Hodgkin Disease	2
Sunitinib	Leukemia, Lymphocytic, Chronic, B-Cell	2
Sunitinib	Blast Phase	2
Sunitinib	Lymphoma, Large B-Cell, Diffuse	2
Sunitinib	Myocardial Infarction	2
Telmisartan	Schizophrenia	2
Telmisartan	Osteoarthritis	2
Testosterone	Kidney Diseases	2
Tetracycline	Psoriasis	2
Tetracycline	Hyperkeratosis	2
Tetracycline	Nephrotic syndrome, type 5, with or without ocular abnormalities	2
Tetracycline	Familial type 3 hyperlipoproteinemia	2
Thiocoumarin	Dermatitis, Atopic	2
Thiocoumarin	Sarcoidosis	2
Thiothixene	Bipolar affective disorder	2
Thiothixene	Urticaria	2
Thiothixene	Diabetes mellitus type 2	2
Thiothixene	Diabetes Mellitus, Type 1	2
Thiothixene	Adenocarcinoma, ovarian, somatic, 167000 (3)	2
Thiothixene	Myocardial Infarction	2
Thiothixene	Kidney Diseases	2
Thiothixene	Liver Cirrhosis, Biliary	2
Thiothixene	Autoimmune disease 1	2
Thiothixene	Inflammatory Bowel Diseases	2
Thiothixene	Heart Diseases	2
Ticagrelor	Hyperlipidemia, combined, 1	2
Ticagrelor	Arthritis, Rheumatoid	2
Ticagrelor	Major depressive disorder	2
Ticagrelor	Myocardial Infarction	2
Ticagrelor	Cutaneous T-cell lymphoma	2
Ticagrelor	Status epilepticus	2
Ticagrelor	Alzheimer Disease	2
Timolol	Hypertension	2
Timolol	Major depressive disorder	2
Timolol	Depressive Disorder	2
Timolol	Schizophrenia	2
Timolol	Bipolar affective disorder	2
Timolol	Alzheimer Disease	2
Timolol	Liver Cirrhosis, Biliary	2
Tocainide	Psoriasis	2
Tocainide	Hyperkeratosis	2
Tolvaptan	Hypercholesterolemia, autosomal dominant, type B	2
Tolvaptan	Hypothyroidism	2
Tolvaptan	Heart Diseases	2
Trastuzumab	Lupus Erythematosus, Systemic	2
Treprostinil	Osteoarthritis	2
Treprostinil	Hypertension	2
Treprostinil	Myocardial Infarction	2
Triptorelin	Prostatic Neoplasms	2
Ulipristal	Adenocarcinoma, ovarian, somatic, 167000 (3)	2
Ulipristal	Dermatosis NOS	2
Vandetanib	Non-small cell lung carcinoma	2
Vandetanib	Hypertension	2
Vortioxetine	Acromegaly	2
Vortioxetine	Asthma	2
Vortioxetine	Kidney Diseases	2
Vortioxetine	Diabetes Mellitus, Type 1	2
Vortioxetine	Psoriasis	2
XL228	Leukemia, Myeloid, Chronic-Phase	2
Zidovudine	Hyperlipidemia, combined, 1	2
1-(2-nitrophenyl)-2,2,2-trifluoroethyl]-arsenocholine	Alzheimer Disease	1
1-(4-HEXYLPHENYL)PROP-2-EN-1-ONE	Hypothyroidism	1
1-(4-HEXYLPHENYL)PROP-2-EN-1-ONE	Goiter, multinodular 1, with or without sertoli-leydig cell tumors	1
1-(6-CYANO-3-PYRIDYLCARBONYL)-5',8'-DIFLUOROSPIRO[PIPERIDINE-4,2'(1'H)-QUINAZOLINE]-4'-AMINE	Crohn Disease	1
1-(6-CYANO-3-PYRIDYLCARBONYL)-5',8'-DIFLUOROSPIRO[PIPERIDINE-4,2'(1'H)-QUINAZOLINE]-4'-AMINE	Sarcoidosis	1
1-(6-CYANO-3-PYRIDYLCARBONYL)-5',8'-DIFLUOROSPIRO[PIPERIDINE-4,2'(1'H)-QUINAZOLINE]-4'-AMINE	Lupus Erythematosus, Systemic	1
1-(6-CYANO-3-PYRIDYLCARBONYL)-5',8'-DIFLUOROSPIRO[PIPERIDINE-4,2'(1'H)-QUINAZOLINE]-4'-AMINE	Anterior uveitis	1
1-(6-CYANO-3-PYRIDYLCARBONYL)-5',8'-DIFLUOROSPIRO[PIPERIDINE-4,2'(1'H)-QUINAZOLINE]-4'-AMINE	Multiple Sclerosis	1
1-(6-CYANO-3-PYRIDYLCARBONYL)-5',8'-DIFLUOROSPIRO[PIPERIDINE-4,2'(1'H)-QUINAZOLINE]-4'-AMINE	Arthritis, Rheumatoid	1
1-(6-CYANO-3-PYRIDYLCARBONYL)-5',8'-DIFLUOROSPIRO[PIPERIDINE-4,2'(1'H)-QUINAZOLINE]-4'-AMINE	Lymphoma, Follicular	1
1-(6-CYANO-3-PYRIDYLCARBONYL)-5',8'-DIFLUOROSPIRO[PIPERIDINE-4,2'(1'H)-QUINAZOLINE]-4'-AMINE	Cutaneous T-cell lymphoma	1
1-(6-CYANO-3-PYRIDYLCARBONYL)-5',8'-DIFLUOROSPIRO[PIPERIDINE-4,2'(1'H)-QUINAZOLINE]-4'-AMINE	Dermatitis, Atopic	1
1-(6-CYANO-3-PYRIDYLCARBONYL)-5',8'-DIFLUOROSPIRO[PIPERIDINE-4,2'(1'H)-QUINAZOLINE]-4'-AMINE	Inflammatory Bowel Diseases	1
1-(6-CYANO-3-PYRIDYLCARBONYL)-5',8'-DIFLUOROSPIRO[PIPERIDINE-4,2'(1'H)-QUINAZOLINE]-4'-AMINE	Rheumatoid arthritis	1
1-(6-CYANO-3-PYRIDYLCARBONYL)-5',8'-DIFLUOROSPIRO[PIPERIDINE-4,2'(1'H)-QUINAZOLINE]-4'-AMINE	Non-Hodgkin lymphoma	1
1-(HYDROXYMETHYLENEAMINO)-8-HYDROXY-OCTANE	Acute myocardial ischemia	1
1-[[(1E)-2-(4-CHLOROPHENYL)ETHENYL]SULFONYL]-4-[[1-(4-PYRIDINYL)-4-PIPERIDINYL]METHYL]PIPERAZINE	Deep venous thrombosis	1
1-[2-AMINO-2-CYCLOHEXYL-ACETYL]-PYRROLIDINE-3-CARBOXYLIC ACID 5-CHLORO-2-(2-ETHYLCARBAMOYL-ETHOXY)-BENZYLAMIDE	Acute myocardial ischemia	1
1-{2-[(4-CHLOROPHENYL)AMINO]-2-OXOETHYL}-N-(1-ISOPROPYLPIPERIDIN-4-YL)-1H-INDOLE-2-CARBOXAMIDE	Deep venous thrombosis	1
1-{2-[(4-CHLOROPHENYL)AMINO]-2-OXOETHYL}-N-(1-ISOPROPYLPIPERIDIN-4-YL)-1H-INDOLE-2-CARBOXAMIDE	Acute myocardial ischemia	1
2-(2-HYDROXY-BIPHENYL)-1H-BENZOIMIDAZOLE-5-CARBOXAMIDINE	Acute myocardial ischemia	1
2-(5-CHLORO-2-THIENYL)-N-{(3S)-1-[(1S)-1-METHYL-2-MORPHOLIN-4-YL-2-OXOETHYL]-2-OXOPYRROLIDIN-3-YL}ETHENESULFONAMIDE	Acute myocardial ischemia	1
2-(5-CHLORO-2-THIENYL)-N-{(3S)-1-[(1S)-1-METHYL-2-MORPHOLIN-4-YL-2-OXOETHYL]-2-OXOPYRROLIDIN-3-YL}ETHENESULFONAMIDE	Deep venous thrombosis	1
2-[2-(2-Cyclohexyl-2-Guanidino-Acetylamino)-Acetylamino]-N-(3-Mercapto-Propyl)-Propionamide	Asthma	1
2-[2-(2-Cyclohexyl-2-Guanidino-Acetylamino)-Acetylamino]-N-(3-Mercapto-Propyl)-Propionamide	Allergic rhinitis	1
2-[2-(2-Cyclohexyl-2-Guanidino-Acetylamino)-Acetylamino]-N-(3-Mercapto-Propyl)-Propionamide	Hay fever	1
2-[2-(2-Cyclohexyl-2-Guanidino-Acetylamino)-Acetylamino]-N-(3-Mercapto-Propyl)-Propionamide	Rhinitis, Allergic, Seasonal	1
2-chloro-5-[(1S)-1-hydroxy-3-oxo-2H-isoindol-1-yl]benzenesulfonamide	Kidney Diseases	1
3-SULFOOXY-1H-INDOLE	Neoplasms	1
4-({[4-(3-METHYLBENZOYL)PYRIDIN-2-YL]AMINO}METHYL)BENZENECARBOXIMIDAMIDE	Acute myocardial ischemia	1
4-[(1S,2S,5S)-5-(HYDROXYMETHYL)-6,8,9-TRIMETHYL-3-OXABICYCLO[3.3.1]NON-7-EN-2-YL]PHENOL	Prostatic Neoplasms	1
4-[1-allyl-7-(trifluoromethyl)-1H-indazol-3-yl]benzene-1,3-diol	Prostatic Neoplasms	1
4-[3-(4-CHLOROPHENYL)-1H-PYRAZOL-5-YL]PIPERIDINE	Acute myocardial ischemia	1
4-[5-Pyridin-4-Yl-1h-[1,2,4]Triazol-3-Yl]-Pyridine-2-Carbonitrile	Hyperuricemia, pulmonary hypertension, renal failure, and alkalosis	1
6-Nitroindazole	Anterior uveitis	1
6-Nitroindazole	Sarcoidosis	1
AC-(D)PHE-PRO-BOROHOMOORNITHINE-OH	Acute myocardial ischemia	1
ACP-104	Schizophrenia	1
ACP-104	Autism 15	1
Agmatine	Alzheimer Disease	1
Agmatine	Schizophrenia	1
Agmatine	Autism 15	1
Agmatine	Hypertension	1
AL5424	Kidney Diseases	1
ALKS 27	Urticaria	1
ALKS 27	Pruritus	1
ALKS 27	Allergic rhinitis	1
Aminocaproic Acid	Arterial Occlusive Diseases	1
Aminoguanidine	Diabetes Mellitus, Type 1	1
Aminoguanidine	Hypertension	1
Aminoguanidine	Anterior uveitis	1
Aminoguanidine	Lymphoma, Follicular	1
Aminoguanidine	Non-Hodgkin lymphoma	1
Aminoguanidine	Dermatitis, Atopic	1
Aminopterin	Folic Acid Deficiency	1
ANA971	Arthritis, Rheumatoid	1
ANA971	Malaria, Falciparum	1
Apremilast	Pulmonary Disease, Chronic Obstructive	1
Apremilast	Hay fever	1
Apremilast	Malaria, Falciparum	1
Apremilast	Diabetes mellitus type 2	1
Apremilast	Hypertension	1
Apremilast	Cutaneous T-cell lymphoma	1
Apremilast	Crohn Disease	1
Apremilast	Nephrotic syndrome, type 5, with or without ocular abnormalities	1
Apremilast	Kidney Diseases	1
Apremilast	Hypercholesterolemia, autosomal dominant, type B	1
AZD2171	Renal cell carcinoma, nonpapillary	1
Bicifadine	Hyperlipidemia, combined, 1	1
Buspirone	Bipolar affective disorder	1
Buspirone	Hypersensitivity	1
Buspirone	Diabetes mellitus type 2	1
Buspirone	Inflammatory Bowel Diseases	1
Buspirone	Cutaneous T-cell lymphoma	1
Buspirone	Prostatic Neoplasms	1
Buspirone	Depressive Disorder	1
Buspirone	Major depressive disorder	1
Buspirone	Crohn Disease	1
Buspirone	Liver Cirrhosis, Biliary	1
Cabergoline	Paroxysmal atrial fibrillation	1
Cabergoline	Heart Diseases	1
Cabergoline	Depressive Disorder	1
Cabergoline	Diabetes mellitus type 2	1
Cabergoline	Epilepsy	1
Cabergoline	Adenocarcinoma, ovarian, somatic, 167000 (3)	1
Cabergoline	Gastrointestinal stromal tumor	1
Cabozantinib	Gastrointestinal stromal tumor	1
Cabozantinib	Neoplasms	1
Cabozantinib	Diabetes mellitus type 2	1
Cabozantinib	Diabetes Mellitus, Type 1	1
Cabozantinib	Kidney Diseases	1
Cabozantinib	Lymphoma, Large B-Cell, Diffuse	1
Cabozantinib	Non-small cell lung carcinoma	1
Cabozantinib	Leukemia, Lymphocytic, Chronic, B-Cell	1
Cabozantinib	Cutaneous T-cell lymphoma	1
Caffeine	Depressive Disorder	1
Caffeine	Gastrointestinal stromal tumor	1
Caffeine	Major depressive disorder	1
Caffeine	Arthritis, Rheumatoid	1
Caffeine	Pancreatic adenocarcinoma	1
Caffeine	Diabetes Mellitus, Type 1	1
Caffeine	Renal cell carcinoma, nonpapillary	1
Caffeine	Lymphoma, Large B-Cell, Diffuse	1
Caffeine	Liver Cirrhosis, Biliary	1
Caffeine	Lupus Erythematosus, Systemic	1
Captopril	Diabetes Mellitus, Type 1	1
Captopril	Dermatosis NOS	1
Captopril	Multiple Sclerosis	1
Captopril	Depressive Disorder	1
Captopril	Atrial Fibrillation	1
Captopril	Cancer of Head and Neck	1
Carvedilol	Bipolar affective disorder	1
Carvedilol	Dementia	1
Carvedilol	Hypertension	1
Carvedilol	Major depressive disorder	1
Carvedilol	Hypotension	1
Carvedilol	Diabetes Mellitus, Type 1	1
Carvedilol	Cardiac arrest	1
Carvedilol	Adenocarcinoma, ovarian, somatic, 167000 (3)	1
Carvedilol	Epilepsy	1
Carvedilol	Kidney Diseases	1
Carvedilol	Angina pectoris	1
Carvedilol	Non-small cell lung carcinoma	1
Carvedilol	Prostatic Neoplasms	1
Carvedilol	Arthritis, Rheumatoid	1
Carvedilol	Hypersensitivity	1
Carvedilol	Endometriosis	1
Carvedilol	Gastrointestinal stromal tumor	1
Carvedilol	Osteoarthritis	1
Carvedilol	Ulcerative colitis	1
Carvedilol	Urticaria	1
Carvedilol	Head and Neck Neoplasms	1
Carvedilol	Diarrhea 8, secretory sodium, congenital	1
Carvedilol	Multiple Sclerosis	1
Carvedilol	Arteriosclerosis	1
Carvedilol	Diabetic Nephropathies	1
Carvedilol	Dermatosis NOS	1
Carvedilol	Familial type 3 hyperlipoproteinemia	1
Cefalotin	Diabetes mellitus type 2	1
Cefalotin	Hypertension	1
Cefalotin	Psoriasis	1
Cefalotin	Hyperkeratosis	1
Cefalotin	Diabetic Nephropathies	1
Celiprolol	Asthma	1
Celiprolol	Liver Cirrhosis, Biliary	1
Celiprolol	Diabetes Mellitus, Type 1	1
Celiprolol	Epilepsy	1
Celiprolol	Non-small cell lung carcinoma	1
CHF-1512	Parkinson Disease	1
Chlorphenamine	Hypertension	1
Chlorphenamine	Diabetes Mellitus, Type 1	1
Chlorphenamine	Prostatic Neoplasms	1
Cirazoline	Schizophrenia	1
Cirazoline	Hypotension	1
Cirazoline	Paroxysmal atrial fibrillation	1
Cirazoline	Depressive Disorder	1
Cirazoline	Acromegaly	1
Cirazoline	Rhinitis, Allergic, Seasonal	1
Cirazoline	Hypersensitivity	1
Clocortolone	Insulin Resistance	1
Clocortolone	Ulcerative colitis	1
Clocortolone	Inflammatory Bowel Diseases	1
Clocortolone	Dermatosis NOS	1
Clocortolone	Asthma	1
Clomipramine	Alzheimer Disease	1
Clomipramine	Asthma	1
Clomipramine	Osteoarthritis	1
Clomipramine	Peripheral Arterial Disease	1
Cobimetinib	Gastrointestinal stromal tumor	1
Cobimetinib	Leukemia, Myeloid, Chronic-Phase	1
Colchicine	Kidney Diseases	1
Compound 18	Disorder of endocrine system	1
CTA018	Bone Diseases	1
CTA018	Hypophosphatemia	1
Desflurane	Diabetes Mellitus, Type 1	1
Desflurane	Hypertension	1
Desflurane	Spasticity, childhood-onset, with hyperglycinemia	1
Dexchlorpheniramine maleate	Asthma	1
Dexchlorpheniramine maleate	Schizophrenia	1
Dexchlorpheniramine maleate	Depressive Disorder	1
Dexchlorpheniramine maleate	Hypertension	1
Dexchlorpheniramine maleate	Diabetes Mellitus, Type 1	1
Dexchlorpheniramine maleate	Alzheimer Disease	1
Dexchlorpheniramine maleate	Inflammatory Bowel Diseases	1
Dexchlorpheniramine maleate	Rhinitis, Allergic, Seasonal	1
Dexchlorpheniramine maleate	Prostatic Neoplasms	1
Dexchlorpheniramine maleate	Rheumatoid arthritis	1
Dexfenfluramine	Bipolar affective disorder	1
Dexfenfluramine	Hypertension	1
Dexfenfluramine	Depressive Disorder	1
Dexfenfluramine	Major depressive disorder	1
Dexfenfluramine	Epilepsy	1
Diphemanil Methylsulfate	Asthma	1
Diphemanil Methylsulfate	Pruritus	1
Doxepin	Hypertension	1
Doxepin	Major depressive disorder	1
Doxepin	Depressive Disorder	1
Doxepin	Alzheimer Disease	1
Doxepin	Insomnia	1
Doxepin	Rhinitis, Allergic, Seasonal	1
Doxepin	Hypotension	1
Doxepin	Diabetes mellitus type 2	1
Doxepin	Epilepsy	1
Doxepin	Heart Diseases	1
Doxepin	Adenocarcinoma, ovarian, somatic, 167000 (3)	1
Doxepin	Kidney Diseases	1
Doxepin	Non-small cell lung carcinoma	1
Doxepin	Gastrointestinal stromal tumor	1
Doxepin	Prostatic Neoplasms	1
Doxepin	Hyperlipidemia, combined, 1	1
Doxepin	Endometriosis	1
Doxepin	Hypercholesterolemia, autosomal dominant, type B	1
Doxepin	Pain	1
Doxepin	Osteoarthritis	1
Doxepin	Multiple Sclerosis	1
Doxepin	Cutaneous T-cell lymphoma	1
Doxepin	Nephrotic syndrome, type 5, with or without ocular abnormalities	1
Doxepin	Arteriosclerosis	1
Doxepin	Peripheral Arterial Disease	1
Doxepin	Familial type 3 hyperlipoproteinemia	1
Doxepin	Hodgkin Disease	1
Doxycycline	Leukemia, Lymphocytic, Chronic, B-Cell	1
Doxycycline	Psoriasis	1
Doxycycline	Renal cell carcinoma, nonpapillary	1
Droperidol	Hay fever	1
Droperidol	Acromegaly	1
Droperidol	Major depressive disorder	1
Eluxadoline	Endometriosis	1
Eluxadoline	Kidney Diseases	1
Epicept NP-1	Bipolar affective disorder	1
Epicept NP-1	Parkinson Disease	1
Epicept NP-1	Autism 15	1
Epicept NP-1	Dementia	1
Epicept NP-1	Acromegaly	1
Epicept NP-1	Asthma	1
Epicept NP-1	Paroxysmal atrial fibrillation	1
Epicept NP-1	Allergic rhinitis	1
Epicept NP-1	Rhinitis, Allergic, Seasonal	1
Epicept NP-1	Hay fever	1
Epicept NP-1	Depressive Disorder	1
Epicept NP-1	Major depressive disorder	1
Epicept NP-1	Pruritus	1
Epicept NP-1	Hypersensitivity	1
Epicept NP-1	Hypotension	1
Epicept NP-1	Alzheimer Disease	1
Epicept NP-1	Urticaria	1
Epicept NP-1	Insomnia	1
Esculin	Male hypogonadism	1
Etanercept	Malaria, Falciparum	1
Etanercept	Non-Hodgkin lymphoma	1
Etanercept	Lymphoma, Follicular	1
Etanercept	Arthritis, Psoriatic	1
Etanercept	Rheumatoid arthritis	1
Etanercept	Gingival Diseases	1
Etanercept	Sarcoidosis	1
Ethinamate	Kidney Diseases	1
Flavoxate	Asthma	1
Flavoxate	Parkinsonism	1
Flavoxate	Allergic rhinitis	1
Fludrocortisone	Male hypogonadism	1
Ganaxolone	Status epilepticus	1
Gliclazide	Myocardial Infarction	1
Gliclazide	Psoriasis	1
Gliclazide	Arthritis, Rheumatoid	1
Gliclazide	Hyperkeratosis	1
Gliclazide	Hypothyroidism	1
Gliclazide	Prostatic Neoplasms	1
Gliclazide	Non-Hodgkin lymphoma	1
Gliclazide	Multiple Sclerosis	1
Gliclazide	Hyperlipidemia, combined, 1	1
Gliclazide	Hypercholesterolemia, autosomal dominant, type B	1
Gliclazide	Arteriosclerosis	1
Gliclazide	Endometriosis	1
Gliclazide	Cancer of Head and Neck	1
Haloperidol	Autism 15	1
Haloperidol	Parkinson Disease	1
Haloperidol	Epilepsy	1
Haloperidol	Hypertension	1
Haloperidol	Diabetes mellitus type 2	1
Haloperidol	Adenocarcinoma, ovarian, somatic, 167000 (3)	1
Haloperidol	Depressive Disorder	1
Haloperidol	Endometriosis	1
Haloperidol	Hyperlipidemia, combined, 1	1
Haloperidol	Hypercholesterolemia, autosomal dominant, type B	1
Haloperidol	Rheumatoid arthritis	1
Haloperidol	Arthritis, Rheumatoid	1
Haloperidol	Pancreatic adenocarcinoma	1
Haloperidol	Inflammatory Bowel Diseases	1
Haloperidol	Cutaneous T-cell lymphoma	1
Haloperidol	Pain	1
Haloperidol	Pulmonary Disease, Chronic Obstructive	1
Haloperidol	Osteoarthritis	1
Haloperidol	Musculoskeletal Diseases	1
Haloperidol	Multiple Sclerosis	1
Haloperidol	Dermatitis, Atopic	1
Haloperidol	Autoimmune disease 1	1
Halothane	Hypertension	1
Halothane	Epilepsy	1
Halothane	Arthritis, Rheumatoid	1
Halothane	Nephrotic syndrome, type 5, with or without ocular abnormalities	1
Halothane	Hypothyroidism	1
Halothane	Hyperinsulinemia	1
Halothane	Hypercholesterolemia, autosomal dominant, type B	1
Halothane	Depressive Disorder	1
Halothane	Hyperlipidemia, combined, 1	1
Halothane	Pneumonia	1
Halothane	Autoimmune disease 1	1
Halothane	Insulin Resistance	1
Halothane	Pulmonary Disease, Chronic Obstructive	1
Halothane	Major depressive disorder	1
Halothane	Ulcerative colitis	1
Halothane	Heart Diseases	1
Halothane	Atrial Fibrillation	1
Halothane	Renal cell carcinoma, nonpapillary	1
Halothane	Insomnia	1
Halothane	Urticaria	1
Halothane	Musculoskeletal Diseases	1
Halothane	Familial type 3 hyperlipoproteinemia	1
Halothane	Cutaneous T-cell lymphoma	1
Halothane	Diarrhea 8, secretory sodium, congenital	1
Heptanoic Acid	Arthritis, Rheumatoid	1
Heptanoic Acid	Inflammatory Bowel Diseases	1
Heptanoic Acid	Ulcerative colitis	1
Heptanoic Acid	Rheumatoid arthritis	1
Heptanoic Acid	Colitis, Ulcerative	1
Heptanoic Acid	Crohn Disease	1
Heroin	Endometriosis	1
Hydrocortisone	Multiple Myeloma	1
Hydrocortisone	Dermatosis NOS	1
Hydrocortisone	Diabetes mellitus type 2	1
Hydrocortisone	Hypertension	1
Hydrocortisone	Epilepsy	1
Hydrocortisone	Prostatic Neoplasms	1
Hydrocortisone	Renal cell carcinoma, nonpapillary	1
Hydrocortisone	Kidney Diseases	1
Hydrocortisone	Non-small cell lung carcinoma	1
Hydrocortisone	Diabetes Mellitus, Type 1	1
Hydrocortisone	Hyperlipidemia, combined, 1	1
Hydrocortisone	Uveitis	1
Hydrocortisone	Hypercholesterolemia, autosomal dominant, type B	1
Hydrocortisone	Liver Cirrhosis, Biliary	1
Hydrocortisone	Pain	1
Hydrocortisone	Bipolar affective disorder	1
Hydrocortisone	Myocardial Infarction	1
Hydrocortisone	Major depressive disorder	1
Hydrocortisone	Autism 15	1
Hydrocortisone	Hyperaldosteronism, familial, type IV	1
Hydrocortisone	Thyroid Diseases	1
Hydrocortisone	Parkinson Disease	1
IGN311	Non-small cell lung carcinoma	1
IGN311	Adenocarcinoma, ovarian, somatic, 167000 (3)	1
IGN311	Neoplasms	1
IGN311	Pancreatic adenocarcinoma	1
IGN311	Neuralgia	1
Interferon gamma-1b	Endometriosis	1
intranasal apomorphine	Schizophrenia	1
Ioflupane I-123	Hypersensitivity	1
Irbesartan	Asthma	1
Irbesartan	Inflammatory Bowel Diseases	1
Irbesartan	Hyperlipidemia, combined, 1	1
Irbesartan	Pain	1
Irbesartan	Schizophrenia	1
Irbesartan	Myocardial Infarction	1
Irbesartan	Alzheimer Disease	1
Irbesartan	Rhinitis, Allergic, Seasonal	1
Itopride	Schizophrenia	1
KD7040	Inflammatory Bowel Diseases	1
KD7040	Lymphoma, Follicular	1
KD7040	Sarcoidosis	1
KD7040	Multiple Sclerosis	1
KD7040	Dermatitis, Atopic	1
KD7040	Non-Hodgkin lymphoma	1
Lasofoxifene	Disorder of endocrine system	1
Lenvatinib	Renal cell carcinoma, nonpapillary	1
Lenvatinib	Gastrointestinal stromal tumor	1
Lenvatinib	Neoplasms	1
Lenvatinib	Leukemia, Lymphocytic, Chronic, B-Cell	1
Lenvatinib	Neuroendocrine neoplasm	1
Lenvatinib	Gastrointestinal Neoplasms	1
Lenvatinib	Idiopathic hypereosinophilic syndrome	1
Lenvatinib	Blast Phase	1
Lenvatinib	Leukemia, Myeloid, Chronic-Phase	1
Lenvatinib	Diabetes mellitus type 2	1
Lenvatinib	Autism 15	1
Loxapine	Pruritus	1
Loxapine	Rhinitis, Allergic, Seasonal	1
Loxapine	Alzheimer Disease	1
Loxapine	Angina pectoris	1
Lumateperone	Acromegaly	1
Lumateperone	Alzheimer Disease	1
Maraviroc	Hypertension	1
Maraviroc	Diabetes mellitus type 2	1
Maraviroc	Diabetes Mellitus, Type 1	1
Maraviroc	Asthma	1
Maraviroc	Epilepsy	1
Maraviroc	Crohn Disease	1
Maraviroc	Prostatic Neoplasms	1
Maraviroc	Non-small cell lung carcinoma	1
Maraviroc	Lymphoma, Large B-Cell, Diffuse	1
Memantine	Schizophrenia	1
Memantine	Bipolar affective disorder	1
Memantine	Autism 15	1
Memantine	Epilepsy	1
Memantine	Parkinson Disease	1
Memantine	Hypersensitivity	1
Memantine	Depressive Disorder	1
Memantine	Diabetes Mellitus, Type 1	1
Memantine	Endometriosis	1
Memantine	Major depressive disorder	1
Memantine	Arthritis, Rheumatoid	1
Memantine	Prostatic Neoplasms	1
Memantine	Psoriasis	1
Memantine	Non-small cell lung carcinoma	1
Memantine	Insomnia	1
Menotropins	Prostatic Neoplasms	1
Menotropins	Endometriosis	1
Methoxamine	Schizophrenia	1
Methoxamine	Bipolar affective disorder	1
Methoxamine	Asthma	1
Methoxamine	Hypotension	1
Methoxamine	Paroxysmal atrial fibrillation	1
Methoxamine	Major depressive disorder	1
Methoxamine	Depressive Disorder	1
Methoxamine	Acromegaly	1
Methoxamine	Rhinitis, Allergic, Seasonal	1
Methoxamine	Hypersensitivity	1
Methyclothiazide	Kidney Diseases	1
METHYL-PHE-PRO-AMINO-CYCLOHEXYLGLYCINE	Acute myocardial ischemia	1
Methyldopa	Schizophrenia	1
Methyldopa	Asthma	1
Methyldopa	Parkinson Disease	1
Methyldopa	Bipolar affective disorder	1
Methyldopa	Restless Legs Syndrome	1
Mianserin	Bipolar affective disorder	1
Mianserin	Autism 15	1
Mianserin	Hypersensitivity	1
Mianserin	Hypertension	1
Mianserin	Alzheimer Disease	1
Mianserin	Asthma	1
Mianserin	Endometriosis	1
Mianserin	Pruritus	1
Mianserin	Depressive Disorder	1
Mianserin	Major depressive disorder	1
Mianserin	Diabetes mellitus type 2	1
Mianserin	Epilepsy	1
Mianserin	Rheumatoid arthritis	1
Mianserin	Nicotine Dependence	1
Minocycline	Rheumatoid arthritis	1
N-(3-(Aminomethyl)Benzyl)Acetamidine	Asthma	1
N-(3-(Aminomethyl)Benzyl)Acetamidine	Anterior uveitis	1
N-(3-(Aminomethyl)Benzyl)Acetamidine	Rheumatoid arthritis	1
N-(3-(Aminomethyl)Benzyl)Acetamidine	Sarcoidosis	1
N-cyclooctylglycyl-N-(4-carbamimidoylbenzyl)-L-prolinamide	Acute myocardial ischemia	1
Nafarelin	Prostatic Neoplasms	1
Nilotinib	Idiopathic hypereosinophilic syndrome	1
Nilotinib	Heart Diseases	1
Nilotinib	Rickets	1
NXN-188	Schizophrenia	1
NXN-188	Bipolar affective disorder	1
NXN-188	Hypertension	1
NXN-188	Parkinson Disease	1
Oxaliplatin	orbit (eye disorders)	1
Oxcarbazepine	Diabetes mellitus type 2	1
Oxcarbazepine	Diabetes Mellitus, Type 1	1
Oxcarbazepine	Hypertension	1
Oxcarbazepine	Myocardial Infarction	1
Oxcarbazepine	Psoriasis	1
Oxcarbazepine	Dermatosis NOS	1
Oxcarbazepine	Motor Neuron Disease	1
Oxyphenbutazone	Diabetes mellitus type 2	1
Oxyphenbutazone	Kidney Diseases	1
Oxyphenbutazone	Diabetic Nephropathies	1
Oxyphenbutazone	Hypothyroidism	1
Oxyphenbutazone	Non-Hodgkin lymphoma	1
Pancuronium	Schizophrenia	1
Pargyline	Nicotine Dependence	1
Pasireotide	Acromegaly	1
Phosphoramidon	Diabetes mellitus type 2	1
Pramipexole	Parkinson Disease	1
Pramipexole	Parkinsonism	1
Pramipexole	Hypersensitivity	1
Pramipexole	Hypertension	1
Pramipexole	Urticaria	1
Pramipexole	Alzheimer Disease	1
Pramipexole	Pruritus	1
Pramipexole	Allergic rhinitis	1
Pramipexole	Asthma	1
Pramipexole	Paroxysmal atrial fibrillation	1
Pramipexole	Diabetes Mellitus, Type 1	1
Pramipexole	Diabetes mellitus type 2	1
Prazosin	Schizophrenia	1
Prazosin	Bipolar affective disorder	1
Prazosin	Hyperlipidemia, combined, 1	1
Primidone	Major depressive disorder	1
Primidone	Nicotine Dependence	1
Probenecid	Kidney Diseases	1
Probenecid	Hyperlipidemia, combined, 1	1
Probenecid	Hypercholesterolemia, autosomal dominant, type B	1
Probenecid	Familial type 3 hyperlipoproteinemia	1
Procaine	Nicotine Dependence	1
Procaine	Bipolar affective disorder	1
Propidium	Dementia	1
Propidium	Alzheimer Disease	1
Propiomazine	Schizophrenia	1
Propiomazine	Bipolar affective disorder	1
Propiomazine	Dementia	1
Propiomazine	Parkinson Disease	1
Propiomazine	Autism 15	1
Propiomazine	Hay fever	1
Propiomazine	Parkinsonism	1
Propiomazine	Depressive Disorder	1
Propiomazine	Insomnia	1
Propiomazine	Paroxysmal atrial fibrillation	1
Ranitidine	Major depressive disorder	1
Rimonabant	Asthma	1
Rimonabant	Cutaneous T-cell lymphoma	1
Rimonabant	Non-small cell lung carcinoma	1
Rizatriptan	Parkinson Disease	1
Rizatriptan	Autism 15	1
Rizatriptan	Parkinsonism	1
Rizatriptan	Acromegaly	1
Rizatriptan	Depressive Disorder	1
Rizatriptan	Asthma	1
Rizatriptan	Major depressive disorder	1
Rizatriptan	Epilepsy	1
Rizatriptan	Peripheral Arterial Disease	1
Rizatriptan	Pancreatic adenocarcinoma	1
Rotigotine	Schizophrenia	1
Rotigotine	Bipolar affective disorder	1
Rotigotine	Parkinson Disease	1
Rotigotine	Autism 15	1
Rotigotine	Acromegaly	1
Rotigotine	Hypertension	1
Rotigotine	Alzheimer Disease	1
Rotigotine	Hypersensitivity	1
Rotigotine	Diabetes mellitus type 2	1
Rotigotine	Asthma	1
Rotigotine	Epilepsy	1
Rotigotine	Depressive Disorder	1
Rotigotine	Major depressive disorder	1
Rotigotine	Cutaneous T-cell lymphoma	1
S-Ethylisothiourea	Crohn Disease	1
S-Ethylisothiourea	Lupus Erythematosus, Systemic	1
S-Ethylisothiourea	Inflammatory Bowel Diseases	1
Salbutamol	Prostatic Neoplasms	1
Salbutamol	Hyperlipidemia, combined, 1	1
Salbutamol	Diabetes Mellitus, Type 1	1
Salbutamol	Familial type 3 hyperlipoproteinemia	1
Salbutamol	Epilepsy	1
SCV-07	Discoid lupus erythematosus	1
SCV-07	Arthritis, Rheumatoid	1
Simeprevir	Kidney Diseases	1
Simeprevir	Myocardial Infarction	1
Simeprevir	Hyperlipidemia, combined, 1	1
Simeprevir	Hypercholesterolemia, autosomal dominant, type B	1
SO-101	Pruritus	1
SO-101	Hay fever	1
SSR-126517E	Deep venous thrombosis	1
Sulfamethazine	Diabetes mellitus type 2	1
Sulfamethazine	Kidney Diseases	1
Sulfamethazine	Hyperkeratosis	1
Sulfamethazine	Nephrotic syndrome, type 5, with or without ocular abnormalities	1
Sulfamethazine	Thyroid Diseases	1
Sulfamethazine	Non-Hodgkin lymphoma	1
Sulfamethazine	Multiple Sclerosis	1
Sulfamic Acid 2,3-O-(1-Methylethylidene)-4,5-O-Sulfonyl-Beta-Fructopyranose Ester	Kidney Diseases	1
Sulfasalazine	Pain	1
Sulfasalazine	Osteoarthritis	1
Sulfasalazine	Renal cell carcinoma, nonpapillary	1
Sulfasalazine	Myocardial Infarction	1
Sulfasalazine	Non-Hodgkin lymphoma	1
Sulfasalazine	Arthritis, Psoriatic	1
Sulfasalazine	Lymphoma, Large B-Cell, Diffuse	1
Sulfasalazine	Leukemia, Myeloid, Chronic-Phase	1
Sulfasalazine	Lymphoma, Follicular	1
Sulfasalazine	Non-small cell lung carcinoma	1
Sulfasalazine	Hypertension	1
Sulfasalazine	Psoriasis	1
Sulfasalazine	Sarcoidosis	1
Sulfasalazine	Lupus Erythematosus, Systemic	1
Sulfasalazine	Alzheimer Disease	1
Sunitinib	Gastrointestinal Neoplasms	1
Sunitinib	Leukemia, Myeloid, Chronic-Phase	1
Sunitinib	Idiopathic hypereosinophilic syndrome	1
Sunitinib	Rheumatoid arthritis	1
Sunitinib	Prostatic Neoplasms	1
Sunitinib	Non-small cell lung carcinoma	1
Sunitinib	Hypertension	1
Sunitinib	Ulcerative colitis	1
Sunitinib	Diabetes Mellitus, Type 1	1
Sunitinib	Kidney Diseases	1
Sunitinib	Adenocarcinoma, ovarian, somatic, 167000 (3)	1
Sunitinib	Cutaneous T-cell lymphoma	1
Sunitinib	Crohn Disease	1
Sunitinib	Inflammatory Bowel Diseases	1
Telmisartan	Prostatic Neoplasms	1
Telmisartan	Bipolar affective disorder	1
Telmisartan	Myocardial Infarction	1
Telmisartan	Diarrhea 8, secretory sodium, congenital	1
Telmisartan	Heart Diseases	1
Telmisartan	Hypothyroidism	1
Testosterone	Diabetes mellitus type 2	1
Testosterone	Hypertension	1
Testosterone	Hyperkeratosis	1
Testosterone	Familial type 3 hyperlipoproteinemia	1
Tetracycline	Schizophrenia	1
Thiocoumarin	Anterior uveitis	1
Thiocoumarin	Crohn Disease	1
Thiocoumarin	Lymphoma, Follicular	1
Thiothixene	Autism 15	1
Thiothixene	Acromegaly	1
Thiothixene	Alzheimer Disease	1
Thiothixene	Rheumatoid arthritis	1
Thiothixene	Non-small cell lung carcinoma	1
Thiothixene	Diabetic Nephropathies	1
Thiothixene	Osteoarthritis	1
Thiothixene	Pruritus	1
Thiothixene	Thyroid Diseases	1
Thiothixene	Asthma	1
Thiothixene	Prostatic Neoplasms	1
Thiothixene	Pain	1
Thiothixene	Status epilepticus	1
Thiothixene	Paroxysmal atrial fibrillation	1
Thiothixene	Hyperlipidemia, combined, 1	1
Thiothixene	Endometriosis	1
Thiothixene	Atrial Fibrillation	1
Thiothixene	Amyotrophic Lateral Sclerosis	1
Thiothixene	Diarrhea 8, secretory sodium, congenital	1
Ticagrelor	Arteriosclerosis	1
Ticagrelor	Diabetes mellitus type 2	1
Ticagrelor	Asthma	1
Ticagrelor	Depressive Disorder	1
Ticagrelor	Bipolar affective disorder	1
Ticagrelor	Psoriasis	1
Ticagrelor	Dermatosis NOS	1
Timolol	Pain	1
Timolol	Hypothyroidism	1
Tizanidine	Schizophrenia	1
Tizanidine	Major depressive disorder	1
Tocainide	Dermatosis NOS	1
Tocainide	Diabetic Nephropathies	1
Tocainide	Neoplasms	1
Tolvaptan	Adenocarcinoma, ovarian, somatic, 167000 (3)	1
Tolvaptan	Pain	1
Tolvaptan	Rheumatoid arthritis	1
Tolvaptan	Multiple Sclerosis	1
Treprostinil	Pulmonary hypertension, neonatal, susceptibility to	1
[truncated: 44 more rows]

## Sheet: Drugs by number of predictions
Drug	Number of Indications
Caffeine	63
Doxepin	63
Carvedilol	59
Halothane	54
Thiothixene	53
Haloperidol	52
Vandetanib	50
Lenvatinib	41
Cabergoline	40
Vortioxetine	37
Clomipramine	34
Tolvaptan	32
Apremilast	31
Rotigotine	31
Buspirone	29
Cabozantinib	29
Prazosin	29
Sunitinib	29
Ticagrelor	28
Gliclazide	27
Hydrocortisone	27
Sulfasalazine	24
Loxapine	23
Memantine	23
Captopril	22
Mianserin	22
Telmisartan	20
Bicifadine	19
Epicept NP-1	19
Pramipexole	19
Propiomazine	19
Tocainide	19
Ulipristal	19
Irbesartan	18
Maraviroc	18
Rimonabant	18
Tetracycline	18
3-SULFOOXY-1H-INDOLE	17
Clocortolone	17
Droperidol	17
Pancuronium	17
Sulfamethazine	17
Cefalotin	16
Dexfenfluramine	16
Oxyphenbutazone	16
Rizatriptan	16
Treprostinil	16
Desflurane	15
Dexchlorpheniramine maleate	15
ACP-104	14
Celiprolol	14
Chlorphenamine	14
Oxcarbazepine	14
1-(6-CYANO-3-PYRIDYLCARBONYL)-5',8'-DIFLUOROSPIRO[PIPERIDINE-4,2'(1'H)-QUINAZOLINE]-4'-AMINE	13
4-(1H-IMIDAZOL-1-YL)PHENOL	13
ALKS 27	13
Flavoxate	13
KD7040	13
S-Ethylisothiourea	13
Salbutamol	13
Thiocoumarin	13
Itopride	12
Timolol	12
Azelastine	11
Lumateperone	11
Cirazoline	10
Eluxadoline	10
Etanercept	10
Fludrocortisone	10
Methoxamine	10
Minocycline	10
N-(3-(Aminomethyl)Benzyl)Acetamidine	10
OSI-930	10
Testosterone	10
Ximelagatran	10
XL184	10
Aminoguanidine	9
Doxycycline	9
Liothyronine	9
Nilotinib	9
Simeprevir	9
SO-101	9
XL228	9
Agmatine	8
intranasal apomorphine	8
Oxaliplatin	8
Trastuzumab	8
Bromopride	7
Diphemanil Methylsulfate	7
NXN-188	7
Resveratrol	7
Dinoprost Tromethamine	6
Heptanoic Acid	6
Methyldopa	6
Probenecid	6
Zidovudine	6
(1H-indol-3-yl)-(2-mercapto-ethoxyimino)-acetic acid	5
2-[2-(2-Cyclohexyl-2-Guanidino-Acetylamino)-Acetylamino]-N-(3-Mercapto-Propyl)-Propionamide	5
IGN311	5
Tizanidine	5
YSIL6	5
6-Nitroindazole	4
Bambuterol	4
Bepridil	4
CTA018	4
CYT006-AngQb	4
Pyridoxine	4
Quinidine barbiturate	4
XL880	4
1-(4-HEXYLPHENYL)PROP-2-EN-1-ONE	3
ANA971	3
AZD2171	3
AZD6140	3
Cinchocaine	3
Ganaxolone	3
Histrelin	3
Interferon gamma-1b	3
Nafarelin	3
Pargyline	3
Piperacillin	3
SCV-07	3
Triptorelin	3
(2R,4R)-N~1~-(4-CHLOROPHENYL)-N~2~-[2-FLUORO-4-(2-OXOPYRIDIN-1(2H)-YL)PHENYL]-4-METHOXYPYRROLIDINE-1,2-DICARBOXAMIDE	2
[5-HYDROXY-2-(4-HYDROXYPHENYL)-1-BENZOFURAN-7-YL]ACETONITRILE	2
1-(2-nitrophenyl)-2,2,2-trifluoroethyl]-arsenocholine	2
1-[[(1E)-2-(4-CHLOROPHENYL)ETHENYL]SULFONYL]-4-[[1-(4-PYRIDINYL)-4-PIPERIDINYL]METHYL]PIPERAZINE	2
1-{2-[(4-CHLOROPHENYL)AMINO]-2-OXOETHYL}-N-(1-ISOPROPYLPIPERIDIN-4-YL)-1H-INDOLE-2-CARBOXAMIDE	2
2-(5-CHLORO-2-THIENYL)-N-{(3S)-1-[(1S)-1-METHYL-2-MORPHOLIN-4-YL-2-OXOETHYL]-2-OXOPYRROLIDIN-3-YL}ETHENESULFONAMIDE	2
2-[4-(DIMETHYLAMINO)PHENYL]-6-HYDROXY-3-METHYL-1,3-BENZOTHIAZOL-3-IUM	2
4-({4-[(6-CHLORO-1-BENZOTHIEN-2-YL)SULFONYL]-2-OXOPIPERAZIN-1-YL}METHYL)BENZENECARBOXIMIDAMIDE	2
5-(5-chloro-7H-pyrrolo[2,3-d]pyrimidin-4-yl)-4,5,6,7-tetrahydro-1H-imidazo[4,5-c]pyridine	2
5-chloro-N-({(5S)-2-oxo-3-[4-(3-oxomorpholin-4-yl)phenyl]-1,3-oxazolidin-5-yl}methyl)thiophene-2-carboxamide	2
Aflibercept	2
Aminocaproic Acid	2
Asimadoline	2
CHF-1512	2
Cilastatin	2
Cobimetinib	2
Elafin	2
Ethotoin	2
Heroin	2
Menotropins	2
Nalbuphine	2
Paramethadione	2
Pasireotide	2
Phenmetrazine	2
Primidone	2
Procaine	2
Propidium	2
Ranitidine	2
Somatropin recombinant	2
SSR-126517E	2
THIENO[3,2-B]PYRIDINE-2-SULFONIC ACID [2-OXO-1-(1H-PYRROLO[2,3-C]PYRIDIN-2-YLMETHYL)-PYRROLIDIN-3-YL]-AMIDE	2
(17beta)-17-(cyanomethyl)-2-methoxyestra-1(10),2,4-trien-3-yl sulfamate	1
(1S)-2-[(2S,5R)-2-(AMINOMETHYL)-5-ETHYNYLPYRROLIDIN-1-YL]-1-CYCLOPENTYL-2-OXOETHANAMINE	1
(2R,3R,4S)-3-(4-HYDROXYPHENYL)-4-METHYL-2-[4-(2-PYRROLIDIN-1-YLETHOXY)PHENYL]CHROMAN-6-OL	1
(2S,3S)-3-{3-[2-chloro-4-(methylsulfonyl)phenyl]-1,2,4-oxadiazol-5-yl}-1-cyclopentylidene-4-cyclopropyl-1-fluorobutan-2-amine	1
(2S,3S)-3-AMINO-4-[(3S)-3-FLUOROPYRROLIDIN-1-YL]-N,N-DIMETHYL-4-OXO-2-(TRANS-4-[1,2,4]TRIAZOLO[1,5-A]PYRIDIN-5-YLCYCLOHEXYL)BUTANAMIDE	1
(3AS,4R,9BR)-4-(4-HYDROXYPHENYL)-1,2,3,3A,4,9B-HEXAHYDROCYCLOPENTA[C]CHROMEN-8-OL	1
(3AS,4R,9BR)-4-(4-HYDROXYPHENYL)-1,2,3,3A,4,9B-HEXAHYDROCYCLOPENTA[C]CHROMEN-9-OL	1
(3R,4R)-1-{6-[3-(METHYLSULFONYL)PHENYL]PYRIMIDIN-4-YL}-4-(2,4,5-TRIFLUOROPHENYL)PIPERIDIN-3-AMINE	1
(9BETA,11ALPHA,13ALPHA,14BETA,17ALPHA)-11-(METHOXYMETHYL)ESTRA-1(10),2,4-TRIENE-3,17-DIOL	1
(S)-N-(4-carbamimidoylbenzyl)-1-(2-(cyclopentyloxy)ethanoyl)pyrrolidine-2-carboxamide	1
(S)-N-(4-carbamimidoylbenzyl)-1-(3-cyclopentylpropanoyl)pyrrolidine-2-carboxamide	1
1-(HYDROXYMETHYLENEAMINO)-8-HYDROXY-OCTANE	1
1-[2-(S)-AMINO-3-BIPHENYL-4-YL-PROPIONYL]-PYRROLIDINE-2-(S)-CARBONITRILE	1
1-[2-AMINO-2-CYCLOHEXYL-ACETYL]-PYRROLIDINE-3-CARBOXYLIC ACID 5-CHLORO-2-(2-ETHYLCARBAMOYL-ETHOXY)-BENZYLAMIDE	1
2-(2-HYDROXY-BIPHENYL)-1H-BENZOIMIDAZOLE-5-CARBOXAMIDINE	1
2-chloro-5-[(1S)-1-hydroxy-3-oxo-2H-isoindol-1-yl]benzenesulfonamide	1
3-(4-CHLOROPHENYL)-5-(METHYLTHIO)-4H-1,2,4-TRIAZOLE	1
4-({[4-(3-METHYLBENZOYL)PYRIDIN-2-YL]AMINO}METHYL)BENZENECARBOXIMIDAMIDE	1
4-(Aminosulfonyl)-N-[(2,4-Difluorophenyl)Methyl]-Benzamide	1
4-(Aminosulfonyl)-N-[(4-Fluorophenyl)Methyl]-Benzamide	1
4-(Hydroxymercury)Benzoic Acid	1
4-[(1S,2S,5S)-5-(HYDROXYMETHYL)-6,8,9-TRIMETHYL-3-OXABICYCLO[3.3.1]NON-7-EN-2-YL]PHENOL	1
4-[1-allyl-7-(trifluoromethyl)-1H-indazol-3-yl]benzene-1,3-diol	1
4-[3-(4-CHLOROPHENYL)-1H-PYRAZOL-5-YL]PIPERIDINE	1
4-[5-Pyridin-4-Yl-1h-[1,2,4]Triazol-3-Yl]-Pyridine-2-Carbonitrile	1
4-{[(1R,2S)-1,2-dihydroxy-2-methyl-3-(4-nitrophenoxy)propyl]amino}-2-(trifluoromethyl)benzonitrile	1
4-METHYL-N-METHYL-N-(2-PHENYL-2H-PYRAZOL-3-YL)BENZENESULFONAMIDE	1
4-Sulfonamide-[1-(4-Aminobutane)]Benzamide	1
5-HYDROXY-3-[(1R)-1-(1H-PYRROL-2-YL)ETHYL]-2H-INDOL-2-ONE	1
7-(aminomethyl)-6-(2-chlorophenyl)-1-methyl-1H-benzimidazole-5-carbonitrile	1
AC-(D)PHE-PRO-BOROHOMOORNITHINE-OH	1
AL5424	1
Allylestrenol	1
Aminopterin	1
Azimilide	1
Beta-(2-Naphthyl)-Alanine	1
Chlorambucil	1
Clofarabine	1
Colchicine	1
Compound 18	1
CX157	1
Cyanamide	1
Cytarabine	1
Esculin	1
Ethinamate	1
Imiquimod	1
Ioflupane I-123	1
Lasofoxifene	1
LFA703	1
MDV3100	1
Meloxicam	1
Methyclothiazide	1
METHYL-PHE-PRO-AMINO-CYCLOHEXYLGLYCINE	1
N-(3-Phenyl-2-Sulfanylpropanoyl)Phenylalanylalanine	1
N-cyclooctylglycyl-N-(4-carbamimidoylbenzyl)-L-prolinamide	1
Perindopril	1
Phosphoramidon	1
Proflavine	1
Reserpine	1
Sulfamic Acid 2,3-O-(1-Methylethylidene)-4,5-O-Sulfonyl-Beta-Fructopyranose Ester	1
Suramin	1
Thiorphan	1
trans-2-hydroxycinnamic acid	1
